# Supplementary material for: The global, regional, and national burden of colorectal cancer and its attributable risk factors in 195 countries and territories, 1990–2017: a systematic analysis for the Global Burden of Disease Study 2017
Source: PubMed Central journal article supplement (PMC7026697; doi:10.1016/s2468-1253(19)30345-0), 2019-10-21
Supplement: mmc1.pdf [file mmc1.pdf]

# THE LANCET

## Gastroenterology & Hepatology

### Supplementary appendix

This appendix formed part of the original submission and has been peer reviewed. We post it as supplied by the authors.

Supplement to: GBD 2017 Colorectal Cancer Collaborators. The global, regional, and national burden of colorectal cancer and its attributable risk factors in 195 countries and territories, 1990–2017: a systematic analysis for the Global Burden of Disease Study 2017. *Lancet Gastroenterol Hepatol* 2019; published online Oct 21. [http://dx.doi.org/10.1016/S2468-1253\(19\)30345-0](http://dx.doi.org/10.1016/S2468-1253(19)30345-0).

## Supplementary appendix

Supplement to: The global, regional, and national burden of colorectal cancer and its attributable risk factors in 195 countries and territories, 1990–2017: a systematic analysis for the Global Burden of Disease Study 2017

### Table of Contents:

#### Appendix Figures

Appendix Figure 1: Number of incident cases of colorectal cancer from 1990 to 2017 for 21 Global Burden of Disease regions

Appendix Figure 2: Number of deaths of colorectal cancer from 1990 to 2017 for 21 Global Burden of Disease regions

Appendix Figure 3: Global number of deaths and death rate of colorectal cancer per 100 000 population by age and sex, 2017

Appendix Figure 4: Global number of DALYs and DALY rate of colorectal cancer per 100, 000 population by age and sex, 2017

Appendix Figure 5: Global number of YLLs and YLDs and rate of YLLs and YLDs per 100 000 population due to colorectal cancer by age, 2017

Appendix Figure 6: Percentage of DALYs due to colorectal cancer attributable to risk factors for 21 Global Burden of Disease regions, 2017, males.

Appendix Figure 7: Percentage of DALYs due to colorectal cancer attributable to risk factors for 21 Global Burden of Disease regions, 2017, females.

Appendix Figure 8: Percentage of DALYs due to colorectal cancer attributable to risk factors by age for both sexes, 2017

Appendix Figure 9: Percentage of DALYs due to colorectal cancer attributable to risk factors by age for males, 2017

Appendix Figure 10: Percentage of DALYs due to colorectal cancer attributable to risk factors by age for females, 2017

Appendix Figure 11: Percentage and UIs of DALYs due to colorectal cancer attributable to risk factors for 21 GBD regions, both sexes, 2017.

#### Appendix Tables

Appendix Table 1: Data quality rating from 0 to 5 stars, maximum percent well-certified per 5-year interval and percent well-certified across time series for 195 countries, 1980–2017

Appendix Table 2: Covariates used in Cause of Death Ensemble model and assumed direction of relationship with colorectal cancer

Appendix Table 3: Sequelae for colorectal cancer and associated disability weights from GBD 2017

Appendix Table 4: Deaths of colorectal cancer in 1990 and 2017 for both sexes and percentage change of age-standardised rates by 195 countries and territories

Appendix Table 5: DALYs of colorectal cancer in 1990 and 2017 for both sexes and percentage change of age-standardised rates by 195 countries and territories

**Appendix Figure 1: Number of incident cases of colorectal cancer from 1990 to 2017 for 21 Global Burden of Disease regions**

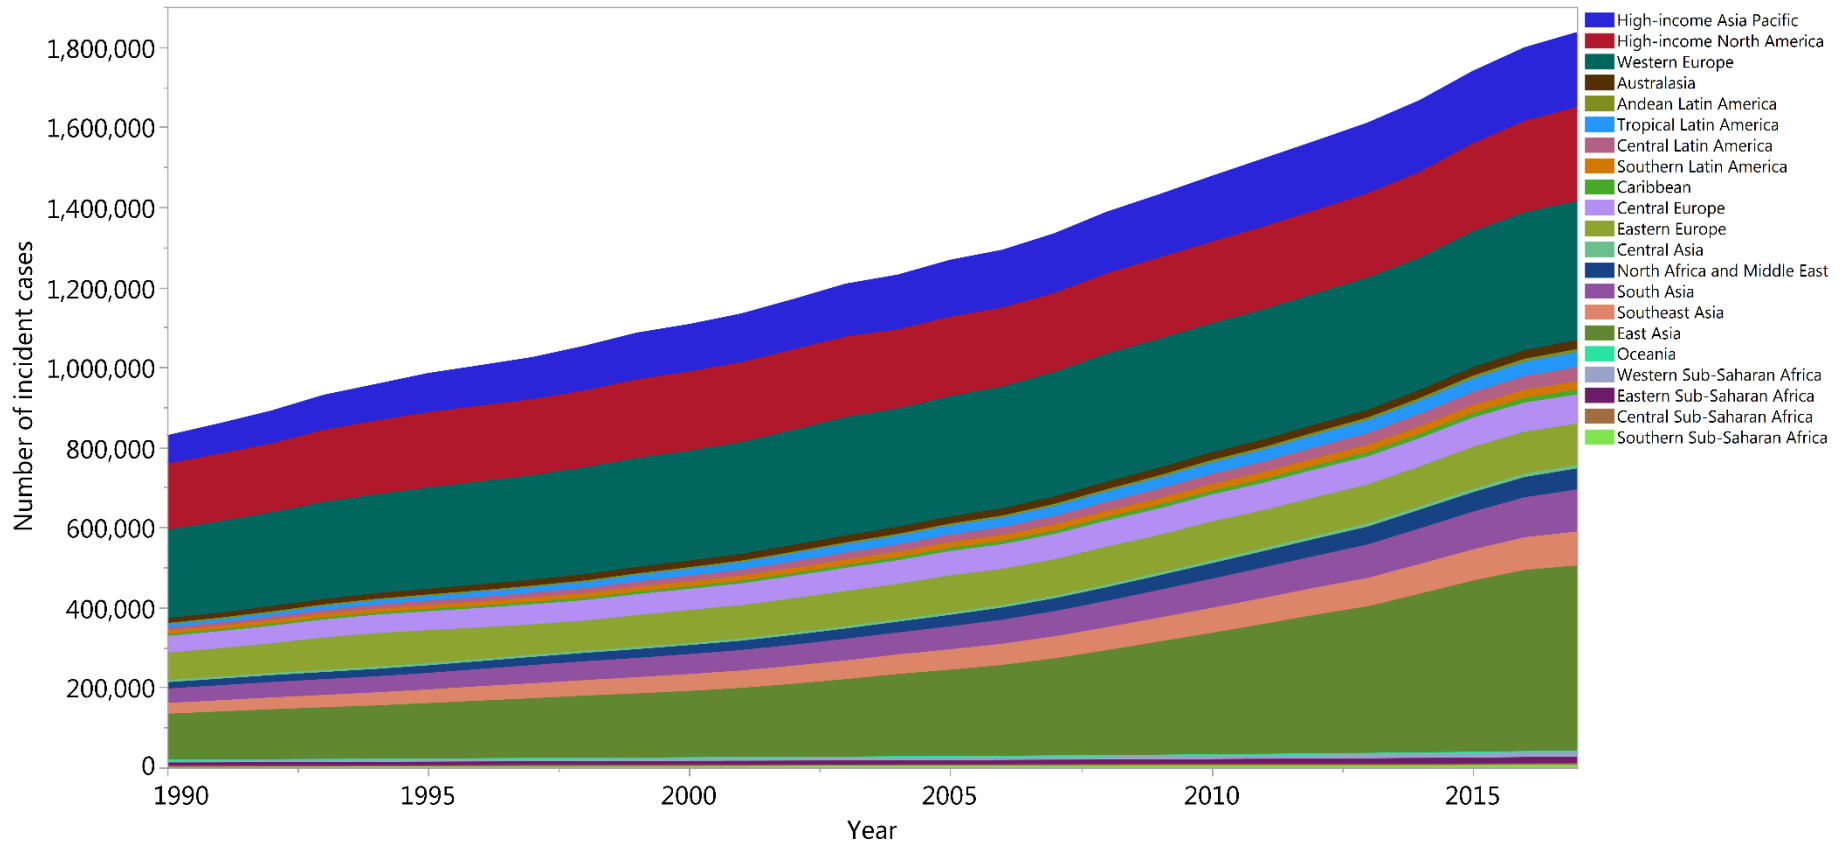

**Appendix Figure 2: Number of deaths of colorectal cancer from 1990 to 2017 for 21 Global Burden of Disease regions**

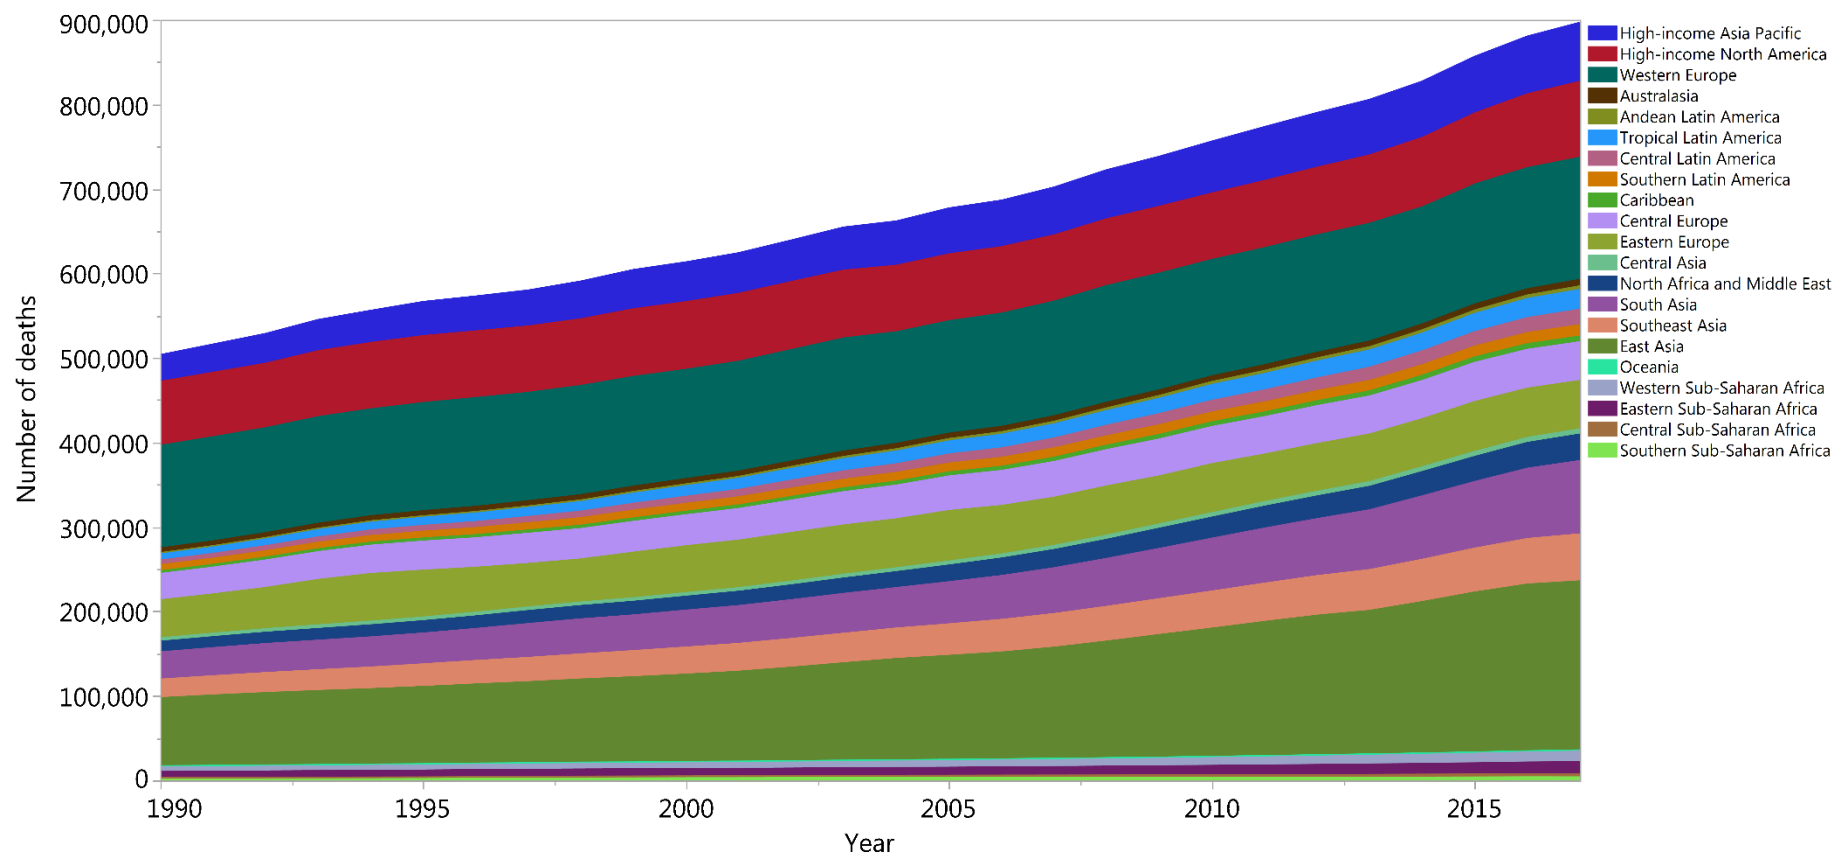

**Appendix Figure 3: Global number of deaths and death rate of colorectal cancer per 100 000 population by age and sex, 2017**

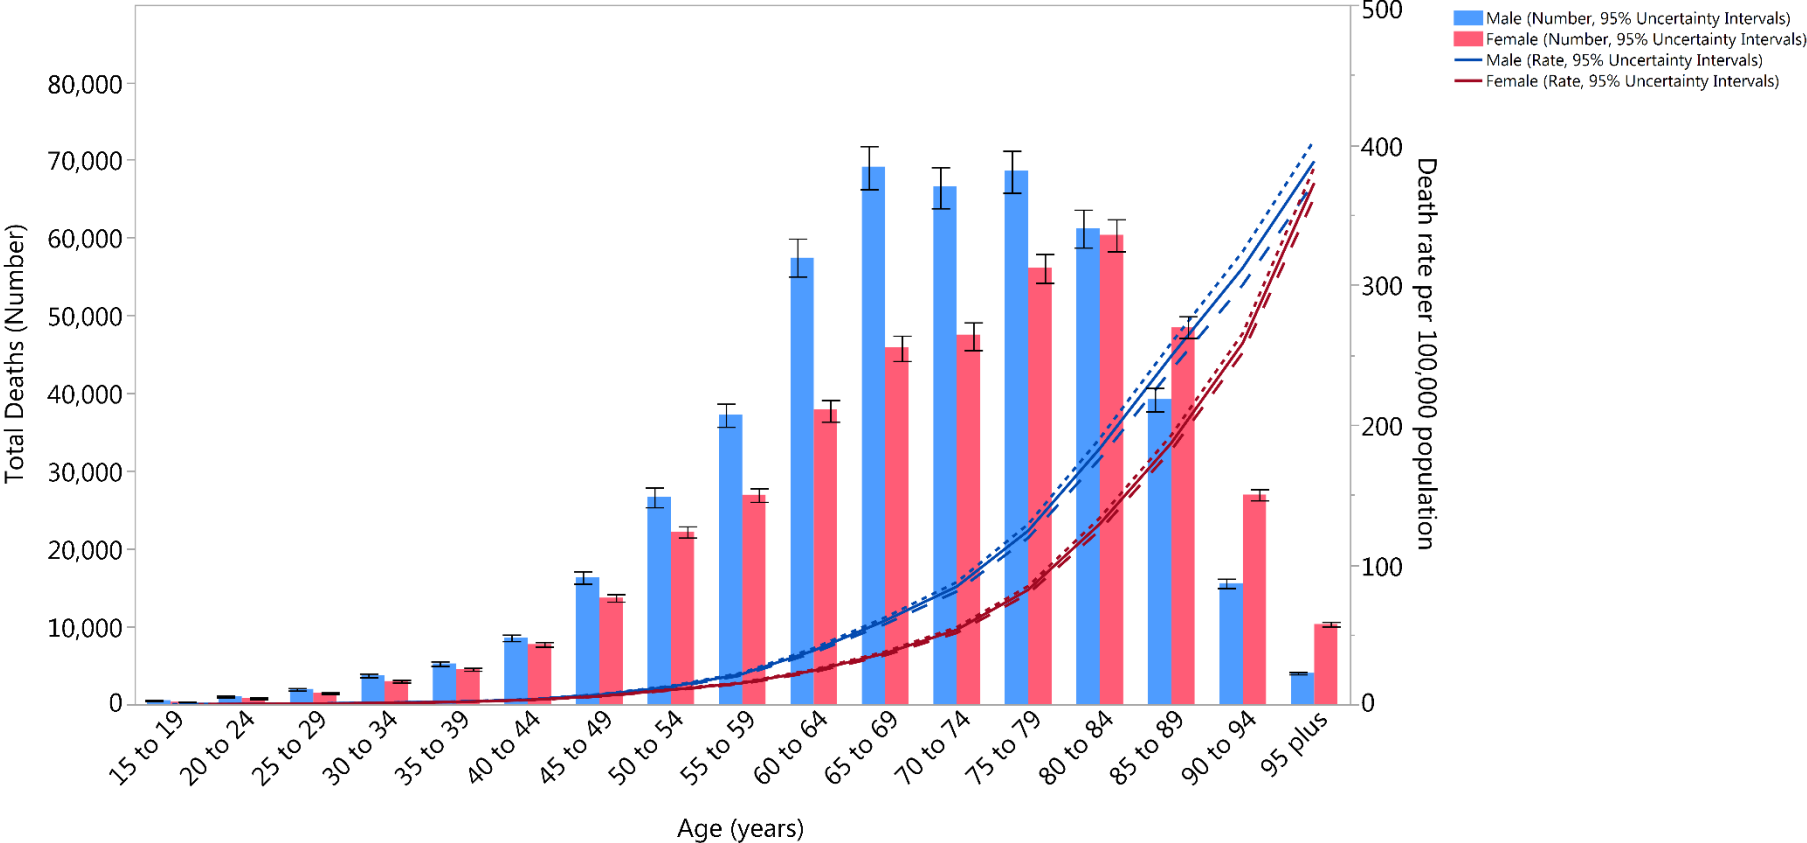

Dotted and dashed lines indicate 95% upper and lower uncertainty intervals, respectively.

**Appendix Figure 4: Global number of DALYs and DALY rate of colorectal cancer per 100, 000 population by age and sex, 2017**

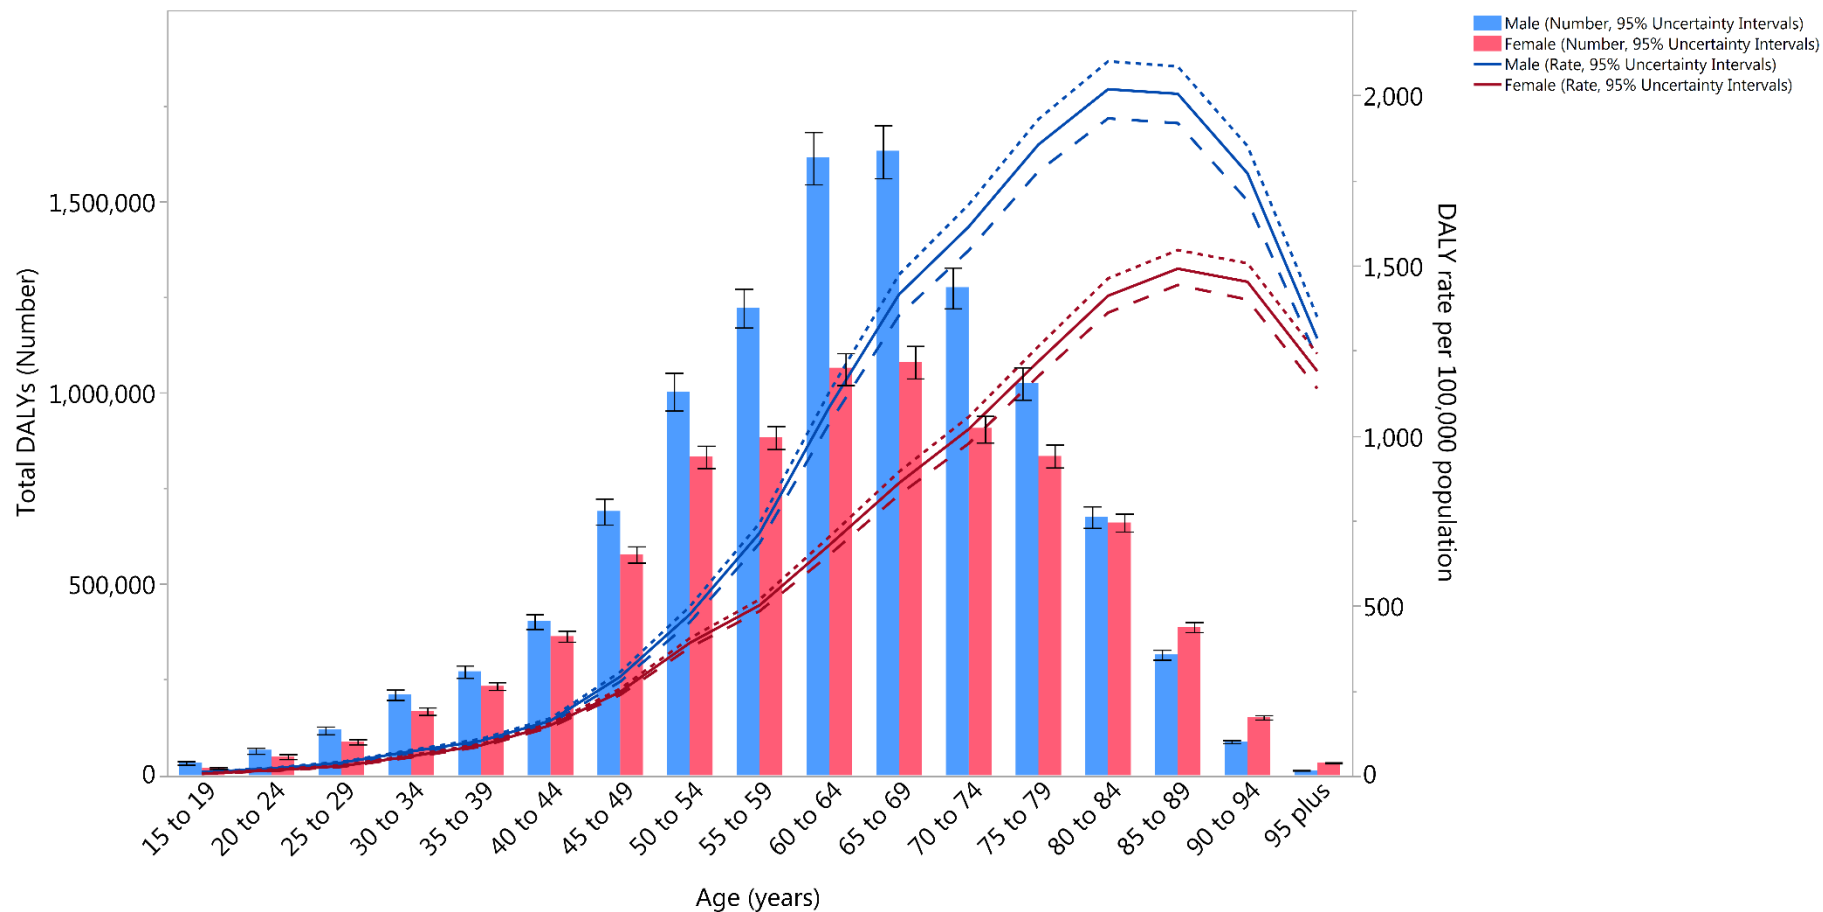

Dotted and dashed lines indicate 95% upper and lower uncertainty intervals, respectively.

**Appendix Figure 5: Global number of YLLs and YLDs and rate of YLLs and YLDs per 100 000 population due to colorectal cancer by age, 2017**

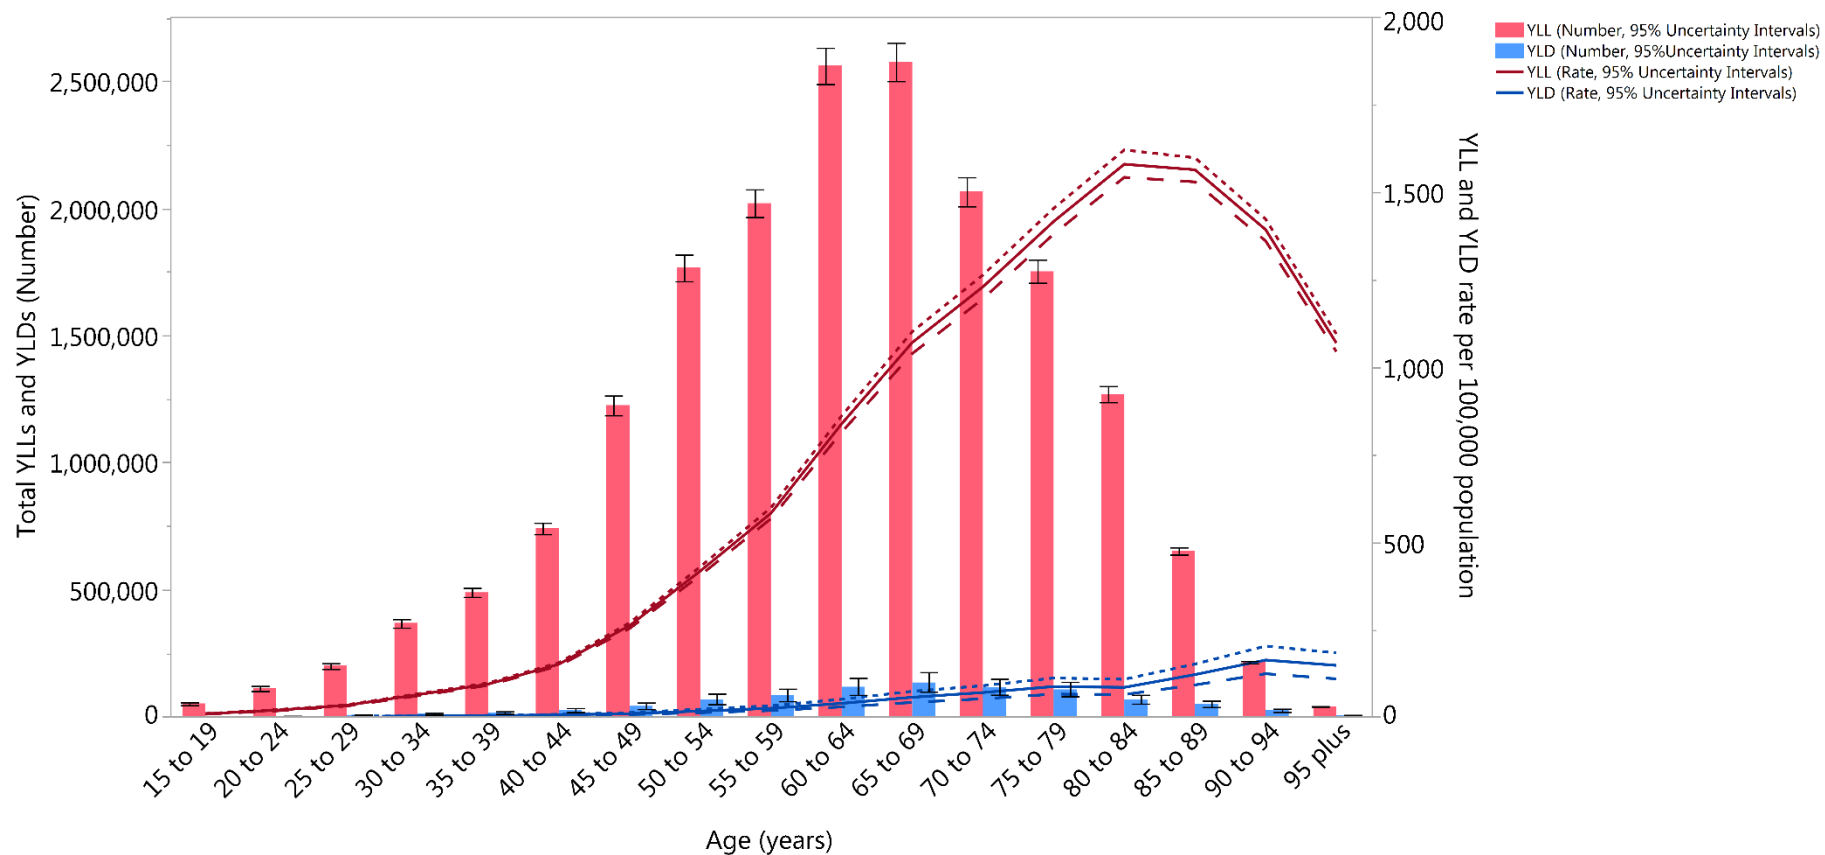

Dotted and dashed lines indicate 95% upper and lower uncertainty intervals, respectively. YLDs=years lived with disability. YLLs=years of life lost.

**Appendix Figure 6: Percentage of DALYs due to colorectal cancer attributable to risk factors for 21 Global Burden of Disease regions, 2017, males.**

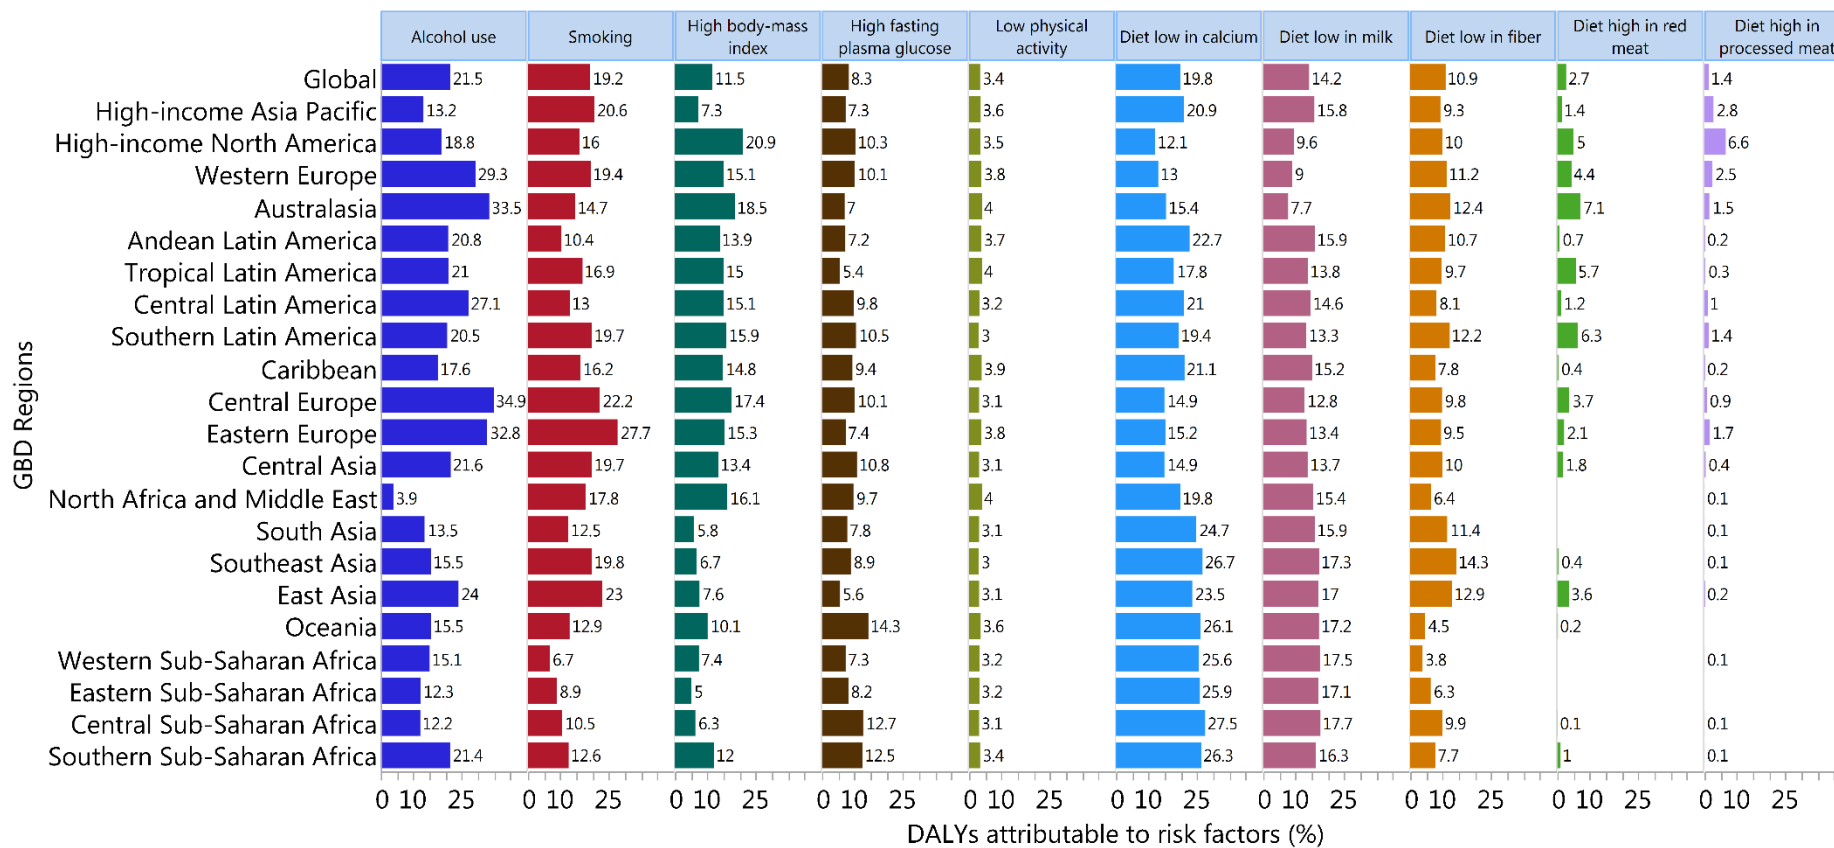

DALY=disability-adjusted life-year.



**Appendix Figure 7: Percentage of DALYs due to colorectal cancer attributable to risk factors for 21 Global Burden of Disease regions, 2017, females.**

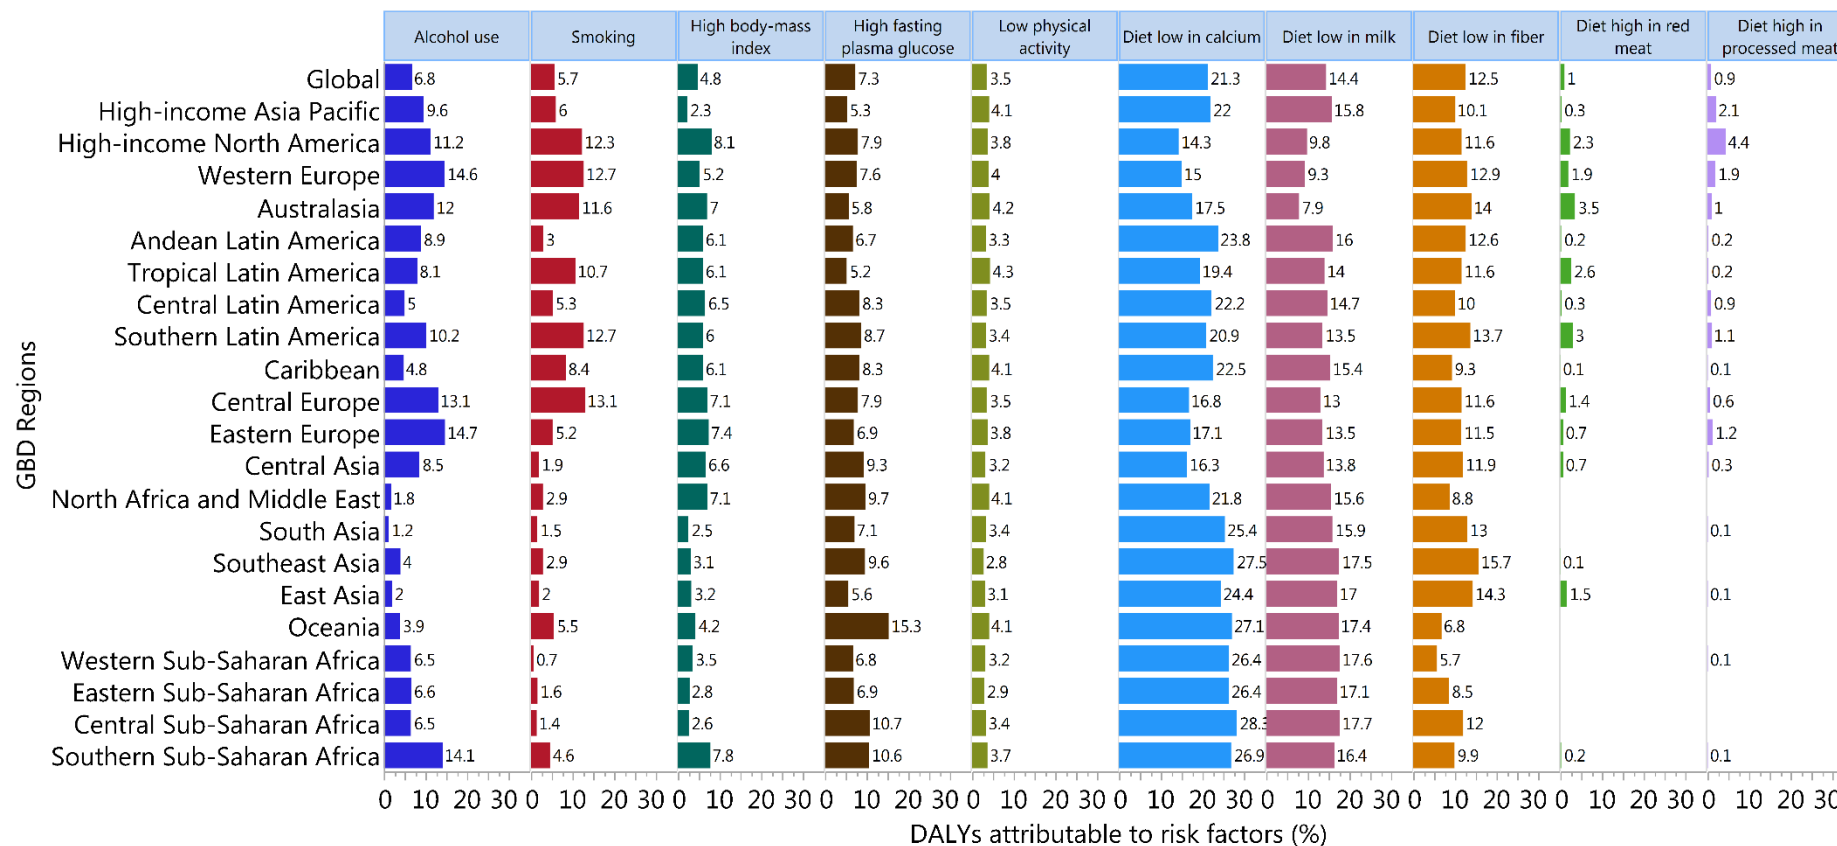

DALY=disability-adjusted life-year.

**Appendix Figure 8: Percentage of DALYs due to colorectal cancer attributable to risk factors by age for both sexes, 2017**

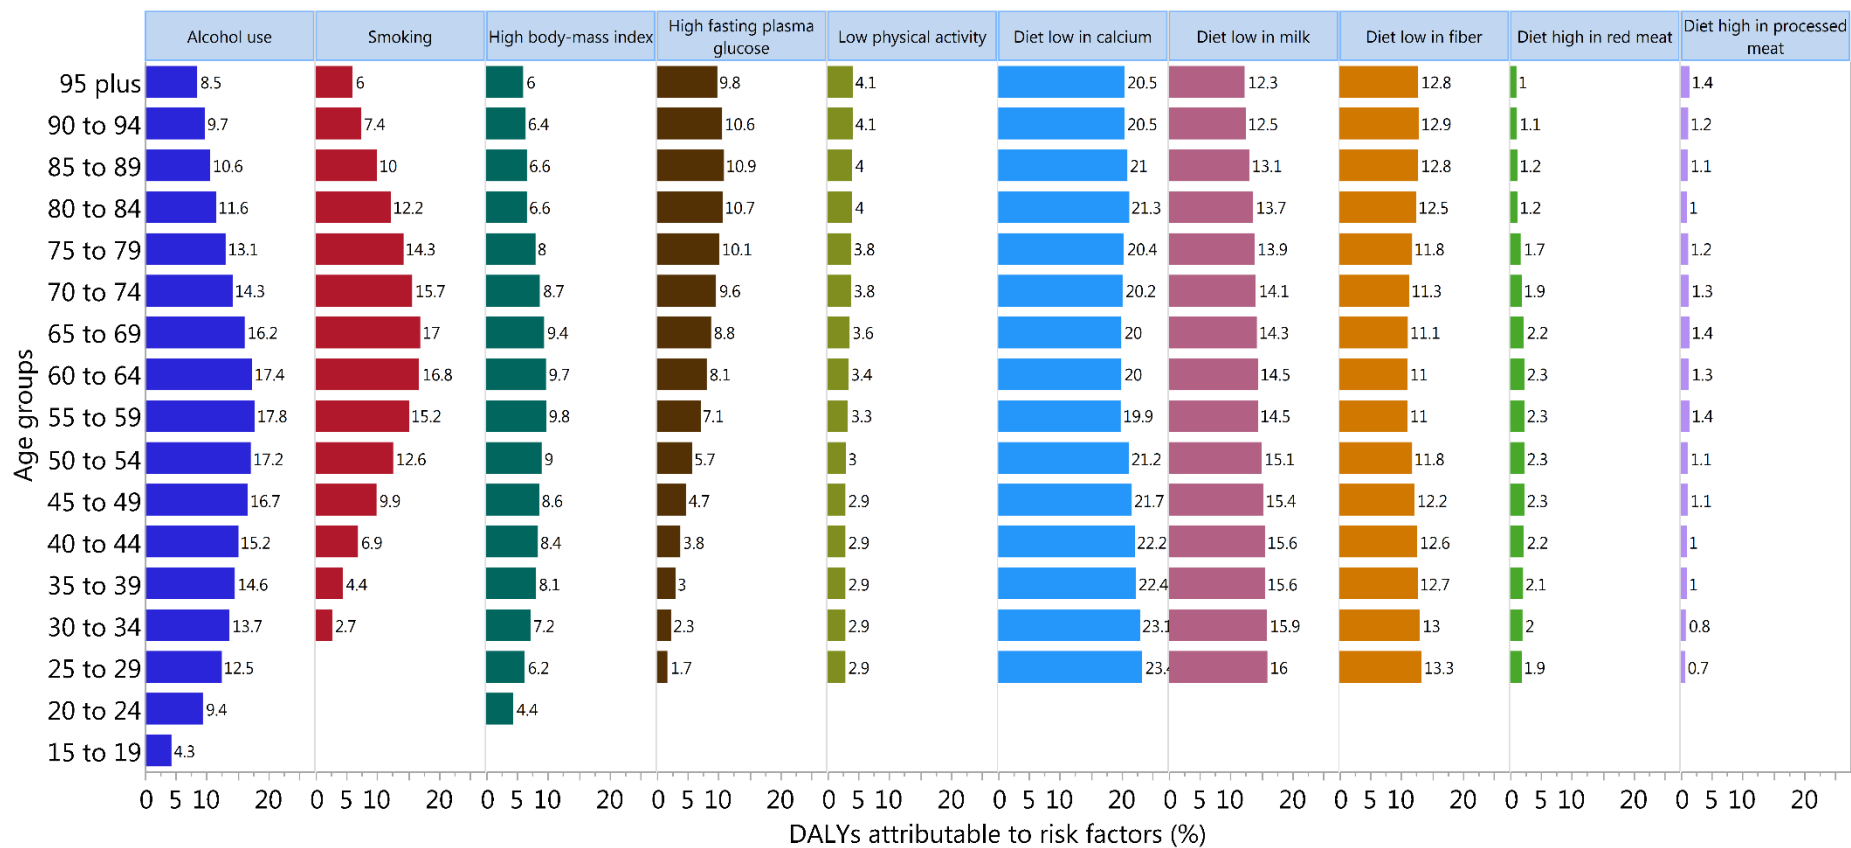

DALY=disability-adjusted life-year.

**Appendix Figure 9: Percentage of DALYs due to colorectal cancer attributable to risk factors by age for males, 2017**

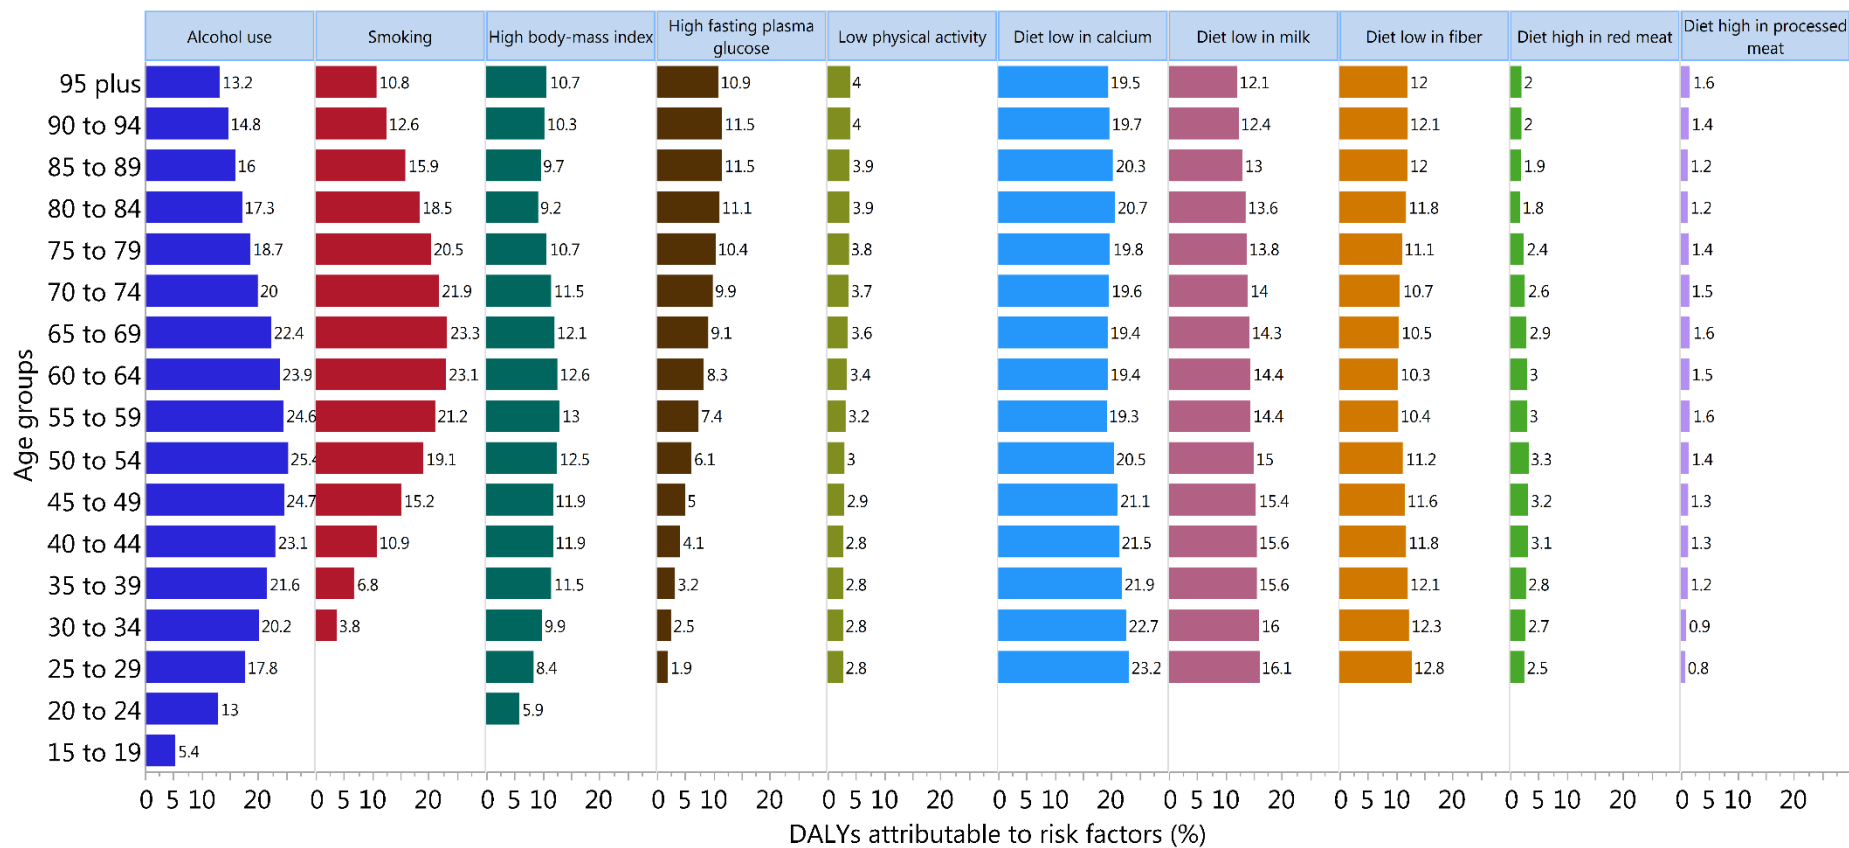

DALY=disability-adjusted life-year.

**Appendix Figure 10: Percentage of DALYs due to colorectal cancer attributable to risk factors by age for females, 2017**

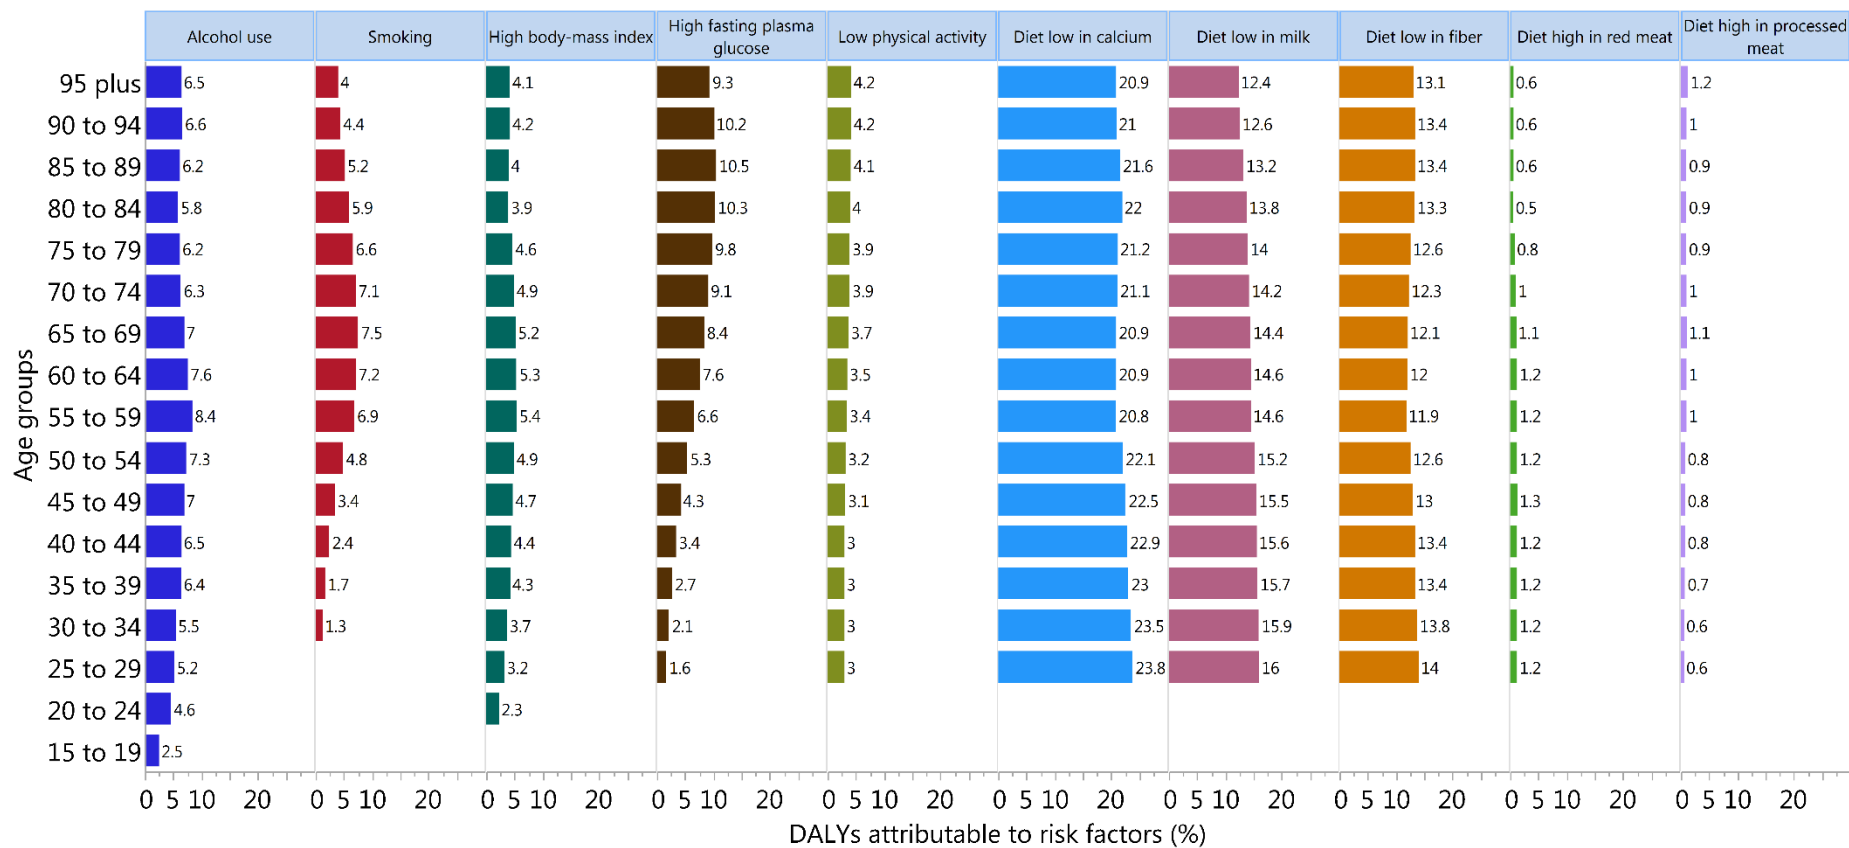

DALY=disability-adjusted life-year.

**Appendix Figure 11: Percentage and UIs of DALYs due to colorectal cancer attributable to risk factors for 21 GBD regions, both sexes, 2017.**

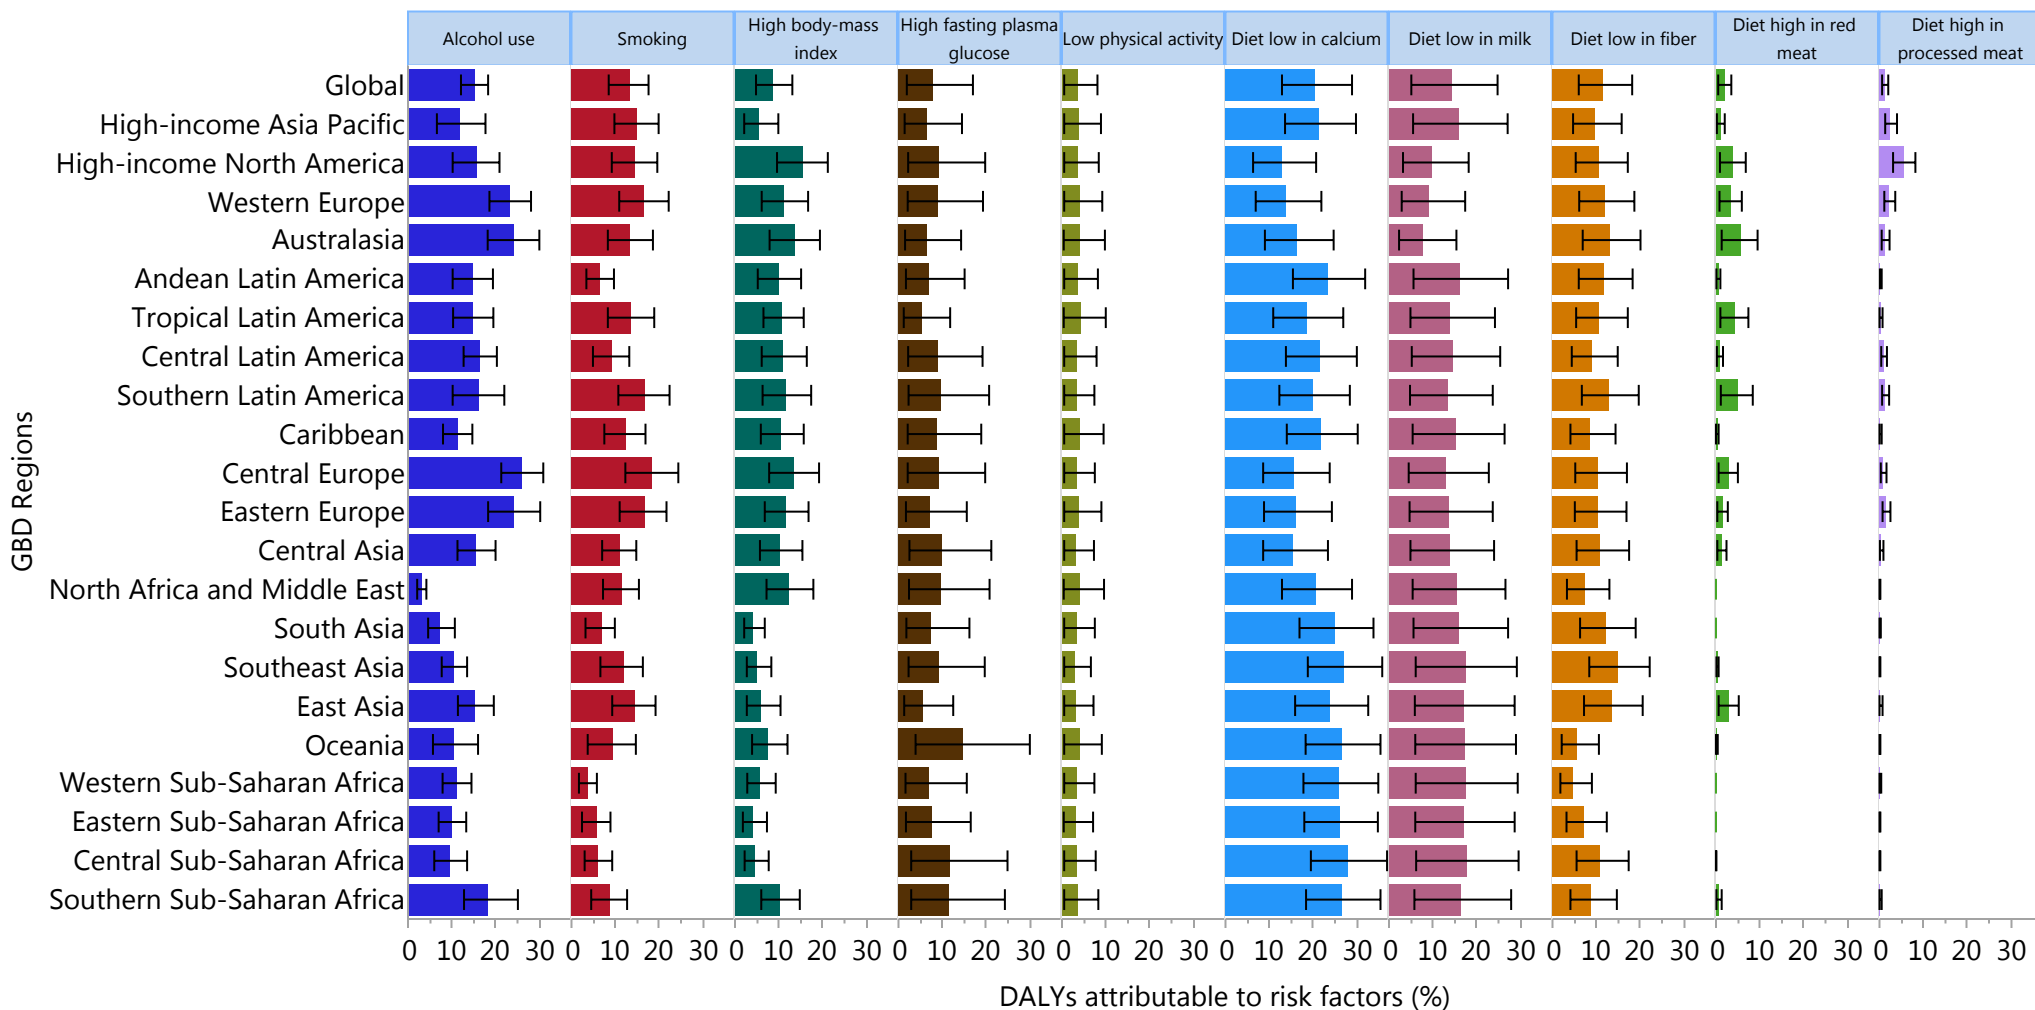

A supplement to figure 7 in the manuscript, which does not include UIs. DALY=disability-adjusted life-year. UI=uncertainty interval. GBD=Global Burden of Disease.

**Appendix Table 1. Data quality rating from 0 to 5 stars, maximum percent well-certified per 5-year interval and percent well-certified across time series for 195 countries, 1980–2017. <sup>1</sup>**

| Country                | Data Quality Rating | 1980-1984 | 1985-1989 | 1990-1994 | 1995-1999 | 2000-2004 | 2005-2009 | 2010-2017 | 1980-2017 |
|------------------------|---------------------|-----------|-----------|-----------|-----------|-----------|-----------|-----------|-----------|
| Afghanistan            | 1                   | 0.0       | 0.0       | 0.0       | 0.0       | 4.6       | 38.2      | 0.0       | 6.1       |
| Albania                | 3                   | 0.0       | 66.1      | 68.6      | 70.7      | 71.8      | 72.5      | 54.7      | 57.8      |
| Algeria                | 1                   | 0.0       | 0.0       | 0.0       | 0.0       | 0.0       | 17.3      | 0.0       | 2.5       |
| American Samoa         | 3                   | 0.0       | 0.0       | 0.0       | 73.7      | 78.2      | 83.4      | 79.4      | 45.0      |
| Andorra                | 0                   | 0.0       | 0.0       | 0.0       | 0.0       | 0.0       | 0.0       | 0.0       | 0.0       |
| Angola                 | 1                   | 0.0       | 0.0       | 0.0       | 0.0       | 0.0       | 0.0       | 4.4       | 0.6       |
| Antigua and Barbuda    | 4                   | 60.9      | 72.0      | 75.1      | 79.5      | 79.3      | 80.0      | 74.7      | 74.5      |
| Argentina              | 4                   | 77.4      | 70.9      | 69.7      | 68.5      | 66.7      | 66.6      | 69.9      | 70.0      |
| Armenia                | 5                   | 74.2      | 78.1      | 85.0      | 88.8      | 88.9      | 92.7      | 91.9      | 85.6      |
| Australia              | 5                   | 93.2      | 93.6      | 92.9      | 92.5      | 91.1      | 90.5      | 90.0      | 91.9      |
| Austria                | 5                   | 89.9      | 90.9      | 90.0      | 88.6      | 91.9      | 90.8      | 89.2      | 90.2      |
| Azerbaijan             | 3                   | 75.5      | 75.4      | 78.1      | 72.0      | 68.2      | 41.8      | 0.0       | 58.7      |
| Bahrain                | 3                   | 0.0       | 78.1      | 0.0       | 61.6      | 64.6      | 55.9      | 56.8      | 45.3      |
| Bangladesh             | 1                   | 2.8       | 4.5       | 25.7      | 4.4       | 12.4      | 6.3       | 6.3       | 8.9       |
| Barbados               | 4                   | 75.0      | 75.8      | 77.6      | 77.4      | 75.6      | 82.1      | 82.0      | 77.9      |
| Belarus                | 4                   | 84.0      | 88.9      | 80.1      | 82.9      | 85.4      | 84.5      | 85.0      | 84.4      |
| Belgium                | 4                   | 77.8      | 77.6      | 81.3      | 84.1      | 82.8      | 82.7      | 80.4      | 81.0      |
| Belize                 | 4                   | 47.5      | 52.4      | 49.8      | 76.6      | 78.3      | 87.1      | 89.1      | 68.7      |
| Benin                  | 1                   | 0.0       | 0.6       | 0.0       | 0.0       | 0.0       | 0.0       | 0.0       | 0.1       |
| Bermuda                | 5                   | 90.4      | 88.7      | 90.2      | 93.5      | 91.1      | 86.4      | 90.3      | 90.1      |
| Bhutan                 | 0                   | 0.0       | 0.0       | 0.0       | 0.0       | 0.0       | 0.0       | 0.0       | 0.0       |
| Bolivia                | 1                   | 0.0       | 0.0       | 0.0       | 0.0       | 14.7      | 0.0       | 0.0       | 2.1       |
| Bosnia and Herzegovina | 2                   | 0.0       | 65.8      | 67.1      | 0.0       | 0.0       | 0.0       | 71.4      | 29.2      |
| Botswana               | 0                   | 0.0       | 0.0       | 0.0       | 0.0       | 0.0       | 0.0       | 0.0       | 0.0       |
| Brazil                 | 4                   | 54.0      | 58.9      | 65.2      | 68.9      | 74.6      | 80.7      | 82.5      | 69.3      |
| Brunei                 | 3                   | 0.0       | 0.0       | 0.0       | 66.7      | 73.2      | 76.1      | 74.5      | 41.5      |

|                          |   |      |      |      |      |      |      |      |      |
|--------------------------|---|------|------|------|------|------|------|------|------|
| Bulgaria                 | 4 | 81.7 | 82.3 | 79.6 | 76.5 | 71.8 | 73.5 | 70.2 | 76.5 |
| Burkina Faso             | 1 | 0.2  | 0.0  | 0.0  | 4.6  | 6.3  | 4.6  | 0.3  | 2.3  |
| Burundi                  | 1 | 0.0  | 0.0  | 2.2  | 0.0  | 0.0  | 0.0  | 0.0  | 0.3  |
| Cambodia                 | 1 | 0.0  | 0.0  | 0.0  | 0.0  | 1.6  | 4.4  | 0.0  | 0.9  |
| Cameroon                 | 0 | 0.0  | 0.0  | 0.0  | 0.0  | 0.0  | 0.0  | 0.0  | 0.0  |
| Canada                   | 5 | 89.4 | 90.0 | 89.1 | 88.6 | 89.3 | 89.4 | 90.1 | 89.4 |
| Cape Verde               | 2 | 56.1 | 0.0  | 0.1  | 0.0  | 0.0  | 0.0  | 67.7 | 17.7 |
| Central African Republic | 0 | 0.0  | 0.0  | 0.0  | 0.0  | 0.0  | 0.0  | 0.0  | 0.0  |
| Chad                     | 0 | 0.0  | 0.0  | 0.0  | 0.0  | 0.0  | 0.0  | 0.0  | 0.0  |
| Chile                    | 4 | 75.7 | 75.5 | 81.7 | 84.7 | 90.8 | 90.8 | 89.8 | 84.1 |
| China                    | 3 | 0.0  | 0.9  | 73.8 | 75.1 | 70.3 | 73.0 | 73.5 | 52.4 |
| Colombia                 | 4 | 72.4 | 74.4 | 77.3 | 88.0 | 88.6 | 88.9 | 88.5 | 82.6 |
| Comoros                  | 0 | 0.0  | 0.0  | 0.0  | 0.0  | 0.0  | 0.0  | 0.0  | 0.0  |
| Congo                    | 0 | 0.0  | 0.0  | 0.0  | 0.0  | 0.0  | 0.0  | 0.0  | 0.0  |
| Costa Rica               | 5 | 81.6 | 83.4 | 82.5 | 91.1 | 92.3 | 90.6 | 90.5 | 87.4 |
| Côte d'Ivoire            | 1 | 0.0  | 1.2  | 1.2  | 0.0  | 0.0  | 0.2  | 0.2  | 0.4  |
| Croatia                  | 4 | 0.0  | 84.4 | 85.3 | 82.6 | 86.1 | 88.3 | 92.3 | 74.1 |
| Cuba                     | 5 | 84.7 | 85.1 | 84.9 | 88.9 | 90.2 | 91.0 | 91.5 | 88.0 |
| Cyprus                   | 2 | 0.0  | 0.0  | 0.0  | 26.8 | 53.8 | 59.5 | 60.9 | 28.7 |
| Czech Republic           | 4 | 0.0  | 90.7 | 89.6 | 84.8 | 84.7 | 85.8 | 87.8 | 74.8 |
| DR Congo                 | 1 | 0.0  | 2.3  | 3.0  | 0.0  | 0.0  | 0.0  | 0.0  | 0.8  |
| Denmark                  | 4 | 84.5 | 82.9 | 83.1 | 85.8 | 85.4 | 84.5 | 84.6 | 84.4 |
| Djibouti                 | 0 | 0.0  | 0.0  | 0.0  | 0.0  | 0.0  | 0.0  | 0.0  | 0.0  |
| Dominica                 | 4 | 71.6 | 63.1 | 62.1 | 65.8 | 68.6 | 81.7 | 83.9 | 71.0 |
| Dominican Republic       | 3 | 53.6 | 53.5 | 44.5 | 53.8 | 57.2 | 56.8 | 59.9 | 54.2 |
| Ecuador                  | 4 | 73.0 | 72.4 | 72.9 | 69.8 | 66.4 | 62.9 | 70.4 | 69.7 |
| Egypt                    | 3 | 35.0 | 48.2 | 46.8 | 0.0  | 43.9 | 42.7 | 48.2 | 37.8 |
| El Salvador              | 3 | 73.3 | 0.0  | 60.4 | 67.2 | 69.4 | 70.8 | 67.4 | 58.4 |
| Equatorial Guinea        | 0 | 0.0  | 0.0  | 0.0  | 0.0  | 0.0  | 0.0  | 0.0  | 0.0  |
| Eritrea                  | 0 | 0.0  | 0.0  | 0.0  | 0.0  | 0.0  | 0.0  | 0.0  | 0.0  |

|                                |   |      |      |      |      |      |      |      |      |
|--------------------------------|---|------|------|------|------|------|------|------|------|
| Estonia                        | 5 | 92.1 | 92.7 | 93.8 | 93.1 | 92.5 | 94.1 | 93.9 | 93.2 |
| Ethiopia                       | 1 | 0.0  | 1.2  | 2.5  | 0.6  | 5.0  | 4.6  | 4.6  | 2.6  |
| Federated States of Micronesia | 0 | 0.0  | 0.0  | 0.0  | 0.0  | 0.0  | 0.0  | 0.0  | 0.0  |
| Fiji                           | 2 | 0.0  | 0.0  | 0.0  | 34.8 | 58.0 | 63.9 | 70.0 | 32.4 |
| Finland                        | 5 | 83.7 | 91.7 | 91.7 | 95.8 | 95.6 | 94.9 | 95.9 | 92.8 |
| France                         | 4 | 76.1 | 78.4 | 79.1 | 79.0 | 79.1 | 79.4 | 77.4 | 78.3 |
| Gabon                          | 0 | 0.0  | 0.0  | 0.0  | 0.0  | 0.0  | 0.0  | 0.0  | 0.0  |
| Georgia                        | 4 | 83.4 | 80.7 | 81.3 | 77.7 | 78.7 | 62.2 | 58.9 | 74.7 |
| Germany                        | 4 | 78.4 | 80.5 | 84.1 | 83.9 | 83.5 | 83.8 | 84.0 | 82.6 |
| Ghana                          | 1 | 0.0  | 0.1  | 1.5  | 0.8  | 7.2  | 16.7 | 0.5  | 3.8  |
| Greece                         | 4 | 80.2 | 81.6 | 71.7 | 72.0 | 72.6 | 77.9 | 76.2 | 76.0 |
| Greenland                      | 3 | 0.0  | 0.0  | 0.0  | 90.2 | 89.7 | 89.6 | 87.6 | 51.0 |
| Grenada                        | 4 | 67.7 | 63.4 | 64.0 | 63.2 | 77.0 | 79.9 | 85.9 | 71.6 |
| Guam                           | 3 | 0.0  | 0.0  | 85.9 | 80.7 | 76.7 | 79.9 | 79.2 | 57.5 |
| Guatemala                      | 4 | 80.1 | 75.0 | 73.9 | 72.6 | 73.3 | 75.2 | 78.0 | 75.4 |
| Guinea                         | 1 | 0.0  | 0.0  | 0.0  | 3.2  | 0.0  | 0.0  | 0.0  | 0.5  |
| Guinea-Bissau                  | 1 | 0.0  | 0.0  | 0.1  | 1.2  | 0.0  | 0.0  | 0.0  | 0.2  |
| Guyana                         | 4 | 55.5 | 76.2 | 69.8 | 78.3 | 84.3 | 85.5 | 78.6 | 75.5 |
| Haiti                          | 1 | 22.3 | 1.3  | 1.0  | 13.9 | 6.1  | 0.0  | 0.0  | 6.4  |
| Honduras                       | 2 | 41.2 | 46.0 | 43.2 | 0.0  | 0.0  | 17.5 | 19.1 | 23.8 |
| Hungary                        | 5 | 91.0 | 89.8 | 89.9 | 91.0 | 92.1 | 92.6 | 93.8 | 91.5 |
| Iceland                        | 5 | 92.6 | 93.8 | 94.2 | 94.1 | 93.5 | 92.9 | 91.4 | 93.2 |
| India                          | 2 | 2.8  | 3.0  | 2.9  | 5.2  | 6.3  | 52.7 | 49.0 | 17.4 |
| Indonesia                      | 2 | 1.4  | 0.0  | 1.3  | 0.4  | 0.3  | 53.7 | 62.3 | 17.1 |
| Iran                           | 2 | 0.0  | 0.0  | 0.0  | 0.0  | 52.8 | 63.7 | 80.3 | 28.1 |
| Iraq                           | 2 | 0.0  | 0.0  | 0.0  | 0.0  | 0.0  | 45.8 | 56.7 | 14.6 |
| Ireland                        | 5 | 90.3 | 91.6 | 91.7 | 90.9 | 90.2 | 92.4 | 92.3 | 91.3 |
| Israel                         | 4 | 81.2 | 82.6 | 83.2 | 82.7 | 81.8 | 80.1 | 80.7 | 81.8 |
| Italy                          | 5 | 88.8 | 88.4 | 88.5 | 87.8 | 88.1 | 88.7 | 88.3 | 88.4 |
| Jamaica                        | 4 | 70.5 | 72.8 | 64.6 | 0.0  | 83.0 | 87.5 | 89.1 | 66.8 |



|                  |   |      |      |      |      |      |      |      |      |
|------------------|---|------|------|------|------|------|------|------|------|
| Japan            | 4 | 82.6 | 81.0 | 81.5 | 87.6 | 85.7 | 84.4 | 81.3 | 83.4 |
| Jordan           | 2 | 0.0  | 0.0  | 0.0  | 1.9  | 70.1 | 76.5 | 74.1 | 31.8 |
| Kazakhstan       | 5 | 80.0 | 84.9 | 89.1 | 88.6 | 85.0 | 84.2 | 84.1 | 85.1 |
| Kenya            | 1 | 0.0  | 2.7  | 0.0  | 0.4  | 4.9  | 5.4  | 0.8  | 2.0  |
| Kiribati         | 2 | 0.0  | 0.0  | 47.9 | 66.6 | 35.6 | 0.0  | 0.0  | 21.4 |
| Kuwait           | 4 | 82.1 | 81.9 | 76.4 | 77.5 | 83.1 | 84.9 | 84.6 | 81.5 |
| Kyrgyzstan       | 4 | 67.5 | 75.9 | 72.5 | 74.4 | 87.4 | 92.9 | 93.2 | 80.6 |
| Laos             | 1 | 0.0  | 1.3  | 0.0  | 0.0  | 0.0  | 0.0  | 0.0  | 0.2  |
| Latvia           | 5 | 92.5 | 92.7 | 89.3 | 92.0 | 91.1 | 88.7 | 94.3 | 91.5 |
| Lebanon          | 1 | 0.0  | 3.5  | 0.0  | 0.0  | 0.0  | 0.0  | 0.0  | 0.5  |
| Lesotho          | 0 | 0.0  | 0.0  | 0.0  | 0.0  | 0.0  | 0.0  | 0.0  | 0.0  |
| Liberia          | 1 | 2.1  | 2.1  | 3.2  | 0.0  | 0.0  | 0.0  | 0.0  | 1.1  |
| Libya            | 1 | 0.0  | 0.0  | 0.0  | 0.0  | 0.0  | 12.6 | 0.0  | 1.8  |
| Lithuania        | 5 | 90.1 | 94.0 | 93.7 | 94.8 | 92.9 | 93.3 | 94.6 | 93.3 |
| Luxembourg       | 4 | 86.4 | 85.8 | 85.5 | 84.5 | 80.6 | 77.9 | 82.5 | 83.3 |
| Macedonia        | 3 | 0.0  | 0.0  | 82.5 | 83.8 | 84.5 | 81.7 | 79.6 | 58.9 |
| Madagascar       | 1 | 2.8  | 3.5  | 2.4  | 2.4  | 0.0  | 0.0  | 0.0  | 1.6  |
| Malawi           | 1 | 0.0  | 2.5  | 0.0  | 0.6  | 2.5  | 4.5  | 0.6  | 1.5  |
| Malaysia         | 2 | 46.9 | 0.0  | 0.0  | 32.1 | 37.3 | 42.0 | 40.2 | 28.4 |
| Maldives         | 2 | 0.0  | 0.0  | 0.0  | 0.0  | 44.0 | 46.6 | 60.1 | 21.5 |
| Mali             | 1 | 4.0  | 0.0  | 0.1  | 0.0  | 0.0  | 0.0  | 0.0  | 0.6  |
| Malta            | 5 | 81.2 | 86.3 | 88.7 | 90.0 | 90.3 | 92.8 | 89.5 | 88.4 |
| Marshall Islands | 0 | 0.0  | 0.0  | 0.0  | 0.0  | 0.0  | 0.0  | 0.0  | 0.0  |
| Mauritania       | 0 | 0.0  | 0.0  | 0.0  | 0.0  | 0.0  | 0.0  | 0.0  | 0.0  |
| Mauritius        | 4 | 75.2 | 79.4 | 78.7 | 78.2 | 83.2 | 85.1 | 86.3 | 80.9 |
| Mexico           | 4 | 68.3 | 77.7 | 78.5 | 79.7 | 82.4 | 84.1 | 88.1 | 79.8 |
| Moldova          | 5 | 88.8 | 91.2 | 81.9 | 87.8 | 85.0 | 83.5 | 83.7 | 86.0 |
| Mongolia         | 2 | 0.0  | 0.0  | 61.2 | 0.0  | 19.6 | 21.4 | 83.4 | 26.5 |
| Montenegro       | 2 | 0.0  | 0.0  | 0.0  | 0.0  | 69.2 | 69.2 | 0.0  | 19.8 |
| Morocco          | 2 | 0.0  | 15.4 | 0.0  | 0.0  | 10.2 | 33.3 | 13.7 | 10.4 |

|                                  |   |      |      |      |      |      |      |      |      |
|----------------------------------|---|------|------|------|------|------|------|------|------|
| Mozambique                       | 2 | 0.0  | 0.0  | 0.0  | 0.1  | 16.2 | 63.4 | 0.0  | 11.4 |
| Myanmar                          | 1 | 0.0  | 0.0  | 0.0  | 0.0  | 0.0  | 2.9  | 49.5 | 7.5  |
| Namibia                          | 0 | 0.0  | 0.0  | 0.0  | 0.0  | 0.0  | 0.0  | 0.0  | 0.0  |
| Nepal                            | 1 | 2.8  | 2.6  | 0.0  | 0.6  | 0.6  | 9.2  | 0.0  | 2.3  |
| Netherlands                      | 4 | 88.5 | 86.7 | 85.2 | 83.9 | 82.3 | 83.2 | 83.3 | 84.7 |
| New Zealand                      | 5 | 95.3 | 95.2 | 95.1 | 96.8 | 96.4 | 96.3 | 95.7 | 95.8 |
| Nicaragua                        | 3 | 0.0  | 54.3 | 56.9 | 69.0 | 77.2 | 84.9 | 90.5 | 61.8 |
| Niger                            | 1 | 0.0  | 0.0  | 0.0  | 0.0  | 0.0  | 35.7 | 0.0  | 5.1  |
| Nigeria                          | 1 | 0.0  | 0.0  | 3.3  | 0.0  | 0.0  | 0.1  | 32.3 | 5.1  |
| North Korea                      | 0 | 0.0  | 0.0  | 0.0  | 0.0  | 0.0  | 0.0  | 0.0  | 0.0  |
| Northern Mariana Islands         | 3 | 0.0  | 0.0  | 0.0  | 75.3 | 71.4 | 80.3 | 82.5 | 44.2 |
| Norway                           | 5 | 88.6 | 89.4 | 88.6 | 88.5 | 86.3 | 84.2 | 84.1 | 87.1 |
| Oman                             | 2 | 0.0  | 0.0  | 0.0  | 0.0  | 0.0  | 73.2 | 34.4 | 15.4 |
| Pakistan                         | 1 | 0.0  | 2.8  | 1.6  | 0.0  | 1.5  | 17.8 | 1.9  | 3.7  |
| Palestine                        | 2 | 0.0  | 0.0  | 0.0  | 29.7 | 32.2 | 34.2 | 74.1 | 24.3 |
| Panama                           | 4 | 72.3 | 75.3 | 0.0  | 83.5 | 86.6 | 86.3 | 84.0 | 69.7 |
| Papua New Guinea                 | 1 | 9.4  | 3.4  | 0.0  | 0.0  | 0.0  | 0.0  | 28.8 | 6.0  |
| Paraguay                         | 3 | 51.3 | 51.2 | 57.2 | 62.7 | 63.6 | 68.8 | 74.0 | 61.3 |
| Peru                             | 3 | 54.9 | 36.1 | 37.2 | 51.1 | 63.3 | 65.4 | 65.9 | 53.4 |
| Philippines                      | 4 | 68.2 | 71.1 | 65.9 | 68.6 | 74.3 | 74.1 | 74.8 | 71.0 |
| Poland                           | 4 | 61.8 | 59.5 | 59.9 | 71.6 | 73.7 | 73.5 | 72.6 | 67.5 |
| Portugal                         | 4 | 76.9 | 77.1 | 76.3 | 76.2 | 79.1 | 77.7 | 80.1 | 77.6 |
| Puerto Rico                      | 4 | 78.6 | 76.7 | 83.9 | 83.2 | 83.6 | 83.6 | 84.4 | 82.0 |
| Qatar                            | 3 | 14.7 | 18.9 | 0.0  | 55.1 | 56.3 | 64.9 | 46.1 | 36.6 |
| Romania                          | 4 | 76.0 | 78.0 | 83.3 | 84.8 | 85.9 | 86.2 | 85.4 | 82.8 |
| Russian Federation               | 5 | 93.0 | 87.3 | 90.7 | 87.6 | 88.0 | 89.3 | 88.8 | 89.3 |
| Rwanda                           | 1 | 0.0  | 0.0  | 0.0  | 0.0  | 0.0  | 22.6 | 0.0  | 3.2  |
| Saint Lucia                      | 4 | 66.8 | 68.2 | 73.2 | 72.1 | 80.0 | 79.0 | 85.6 | 75.0 |
| Saint Vincent and the Grenadines | 4 | 72.3 | 63.4 | 61.2 | 85.3 | 85.1 | 87.6 | 87.3 | 77.5 |
| Samoa                            | 0 | 0.0  | 0.0  | 0.0  | 0.0  | 0.0  | 0.0  | 0.0  | 0.0  |

|                            |   |      |      |      |      |      |      |      |      |
|----------------------------|---|------|------|------|------|------|------|------|------|
| São Tomé and Príncipe      | 1 | 0.0  | 69.6 | 0.0  | 0.0  | 0.0  | 0.0  | 0.0  | 9.9  |
| Saudi Arabia               | 2 | 0.0  | 0.0  | 0.0  | 23.1 | 27.5 | 29.4 | 28.8 | 15.5 |
| Senegal                    | 1 | 2.0  | 2.5  | 2.6  | 2.5  | 0.0  | 0.0  | 0.0  | 1.4  |
| Serbia                     | 3 | 0.0  | 0.0  | 0.0  | 66.7 | 70.8 | 74.9 | 69.6 | 40.3 |
| Seychelles                 | 3 | 74.4 | 71.5 | 0.0  | 0.0  | 75.9 | 76.9 | 78.1 | 53.8 |
| Sierra Leone               | 1 | 0.0  | 0.0  | 3.4  | 0.0  | 0.0  | 0.0  | 0.0  | 0.5  |
| Singapore                  | 5 | 91.2 | 92.0 | 94.6 | 95.1 | 95.3 | 94.9 | 95.7 | 94.1 |
| Slovakia                   | 3 | 0.0  | 0.0  | 82.7 | 81.9 | 84.9 | 90.2 | 92.9 | 61.8 |
| Slovenia                   | 4 | 0.0  | 91.6 | 92.5 | 91.8 | 89.3 | 88.3 | 88.5 | 77.4 |
| Solomon Islands            | 1 | 0.0  | 0.0  | 0.0  | 0.0  | 0.0  | 0.0  | 34.6 | 4.9  |
| Somalia                    | 0 | 0.0  | 0.0  | 0.0  | 0.0  | 0.0  | 0.0  | 0.0  | 0.0  |
| South Africa               | 3 | 0.0  | 0.0  | 1.0  | 67.8 | 72.0 | 72.3 | 70.7 | 40.5 |
| South Korea                | 4 | 0.0  | 57.8 | 74.2 | 75.4 | 84.5 | 82.2 | 81.9 | 65.1 |
| South Sudan                | 0 | 0.0  | 0.0  | 0.0  | 0.0  | 0.0  | 0.0  | 0.0  | 0.0  |
| Spain                      | 4 | 77.3 | 79.4 | 82.6 | 83.8 | 83.1 | 84.0 | 84.8 | 82.1 |
| Sri Lanka                  | 3 | 52.0 | 50.2 | 47.7 | 55.4 | 63.7 | 67.4 | 64.8 | 57.3 |
| Sudan                      | 0 | 0.0  | 0.0  | 0.0  | 0.0  | 0.0  | 0.0  | 0.0  | 0.0  |
| Suriname                   | 4 | 60.0 | 63.7 | 61.2 | 66.4 | 74.3 | 73.3 | 73.9 | 67.5 |
| Swaziland                  | 1 | 0.0  | 0.0  | 0.0  | 0.0  | 0.0  | 0.0  | 0.0  | 0.0  |
| Sweden                     | 5 | 87.4 | 88.6 | 88.2 | 87.1 | 85.7 | 85.9 | 84.8 | 86.8 |
| Switzerland                | 4 | 73.8 | 74.2 | 73.4 | 84.6 | 84.4 | 86.7 | 86.1 | 80.5 |
| Syria                      | 3 | 29.5 | 13.2 | 0.0  | 54.3 | 66.7 | 74.4 | 59.8 | 42.5 |
| Taiwan (Province of China) | 4 | 84.3 | 82.4 | 79.2 | 83.4 | 84.4 | 84.8 | 83.7 | 83.2 |
| Tajikistan                 | 3 | 74.9 | 71.4 | 71.6 | 58.5 | 51.4 | 50.6 | 50.7 | 61.3 |
| Tanzania                   | 1 | 0.0  | 2.8  | 1.8  | 2.1  | 6.3  | 2.5  | 0.0  | 2.2  |
| Thailand                   | 3 | 29.9 | 28.3 | 35.9 | 62.6 | 52.0 | 61.6 | 62.3 | 47.5 |
| The Bahamas                | 4 | 76.2 | 82.6 | 83.0 | 89.8 | 87.7 | 86.7 | 86.3 | 84.6 |
| The Gambia                 | 1 | 2.8  | 2.2  | 2.1  | 0.9  | 0.7  | 1.0  | 0.0  | 1.4  |
| Timor-Leste                | 0 | 0.0  | 0.0  | 0.0  | 0.0  | 0.0  | 0.0  | 0.0  | 0.0  |
| Togo                       | 0 | 0.0  | 0.0  | 0.0  | 0.0  | 0.0  | 0.0  | 0.0  | 0.0  |

|                      |   |      |      |      |      |      |      |      |      |
|----------------------|---|------|------|------|------|------|------|------|------|
| Tonga                | 1 | 0.0  | 0.0  | 0.0  | 0.0  | 53.6 | 0.0  | 0.0  | 7.7  |
| Trinidad and Tobago  | 5 | 79.2 | 83.4 | 85.5 | 89.5 | 90.7 | 89.6 | 90.1 | 86.9 |
| Tunisia              | 1 | 0.0  | 0.0  | 0.0  | 0.0  | 0.0  | 28.9 | 24.8 | 7.7  |
| Turkey               | 3 | 16.8 | 19.6 | 20.7 | 24.0 | 59.7 | 70.3 | 83.9 | 42.2 |
| Turkmenistan         | 4 | 88.4 | 88.1 | 83.0 | 80.9 | 85.1 | 81.0 | 83.4 | 84.3 |
| Uganda               | 1 | 0.0  | 0.0  | 0.0  | 0.0  | 0.0  | 2.7  | 0.0  | 0.4  |
| Ukraine              | 5 | 87.4 | 90.0 | 83.5 | 86.0 | 86.4 | 90.9 | 92.2 | 88.1 |
| United Arab Emirates | 1 | 0.0  | 0.0  | 0.0  | 0.0  | 0.0  | 41.5 | 0.0  | 5.9  |
| United Kingdom       | 5 | 94.2 | 94.1 | 94.1 | 92.0 | 91.4 | 91.5 | 92.4 | 92.8 |
| USA                  | 5 | 88.5 | 88.1 | 88.7 | 88.1 | 88.0 | 87.2 | 86.7 | 87.9 |
| Uruguay              | 4 | 77.3 | 76.0 | 79.1 | 79.1 | 79.6 | 78.5 | 77.5 | 78.1 |
| Uzbekistan           | 4 | 83.1 | 86.3 | 85.0 | 79.0 | 68.3 | 72.2 | 79.8 | 79.1 |
| Vanuatu              | 0 | 0.0  | 0.0  | 0.0  | 0.0  | 0.0  | 0.0  | 0.0  | 0.0  |
| Venezuela            | 5 | 81.3 | 75.2 | 83.3 | 87.8 | 89.8 | 89.5 | 88.9 | 85.1 |
| Vietnam              | 1 | 0.0  | 0.7  | 0.2  | 1.3  | 0.9  | 62.0 | 4.8  | 10.0 |
| Virgin Islands       | 4 | 82.0 | 0.0  | 90.6 | 90.5 | 84.1 | 81.9 | 74.0 | 71.8 |
| Yemen                | 0 | 0.0  | 0.0  | 0.0  | 0.0  | 0.0  | 0.0  | 0.0  | 0.0  |
| Zambia               | 1 | 0.0  | 0.0  | 0.0  | 0.0  | 0.0  | 6.3  | 9.5  | 2.3  |
| Zimbabwe             | 2 | 0.0  | 0.0  | 45.3 | 74.2 | 0.0  | 45.3 | 0.0  | 23.5 |

The value of 0 shows lowest quality and 5 denotes highest quality. The percent of well-certified sources were the proportion of cause of death data that didn't have garbage codes at levels 1 and 2.

**Appendix Table 2. Covariates used in Cause of Death Ensemble model and assumed direction of relationship with colorectal cancer**

| <b>Level</b>                        | <b>Covariate</b>                                                | <b>Direction</b> |
|-------------------------------------|-----------------------------------------------------------------|------------------|
| <b>1</b>                            | Alcohol (litres per capita)                                     | +                |
|                                     | Mean BMI                                                        | +                |
|                                     | Smoking prevalence                                              | +                |
|                                     | Tobacco (cigarettes per capita)                                 | +                |
|                                     | Log-transformed summary exposure value (SEV) scalar: Colorect C | +                |
|                                     | Red meats adjusted (g)                                          | +                |
| <b>2</b>                            | Milk adjusted (g)                                               | -                |
|                                     | Fruits adjusted (g)                                             | -                |
|                                     | Nuts seeds adjusted (g)                                         | -                |
|                                     | whole grains adjusted (g)                                       | -                |
|                                     | Polyunsaturated fatty acid adjusted (percent)                   | -                |
|                                     | Vegetables adjusted (g)                                         | -                |
|                                     | Cumulative cigarettes (5 years)                                 | +                |
|                                     | Cumulative cigarettes (10 years)                                | +                |
|                                     | Cumulative cigarettes (15 years)                                | +                |
|                                     | Cumulative cigarettes (20 years)                                | +                |
|                                     | Diabetes age-specific prevalence (proportion)                   | +                |
| Healthcare Access and Quality Index | -                                                               |                  |
| <b>3</b>                            | Education (years per capita)                                    | -                |
|                                     | Lag distributed income (I\$ per capita)                         | 0                |
|                                     | Socio-demographic Index                                         | 0                |

The SEV scalar reflects the exposure to risk factors related to CRC weighted by their relative risk value, methods for the SEV scalar have been described previously. <sup>2</sup>

**Appendix Table 3: Sequelae for colorectal cancer and associated disability weights from GBD 2017**

| Sequela                                               | Health state name                                                             | Lay description                                                                                                                                                               | Disability weight (95% CI) |
|-------------------------------------------------------|-------------------------------------------------------------------------------|-------------------------------------------------------------------------------------------------------------------------------------------------------------------------------|----------------------------|
| Diagnosis and primary therapy phase                   | Cancer, diagnosis and primary therapy                                         | Has pain, nausea, fatigue, weight loss, and high anxiety.                                                                                                                     | 0.288<br>(0.193-0.399)     |
| Controlled phase, with stoma                          | Stoma and generic medication                                                  | Combined disability weight.                                                                                                                                                   | --                         |
| Controlled phase, without stoma                       | Generic uncomplicated disease: worry and daily medication                     | Has a chronic disease that requires medication every day and causes some worry but minimal interference with daily activities.                                                | 0.049<br>(0.031-0.072)     |
| Metastatic phase                                      | Cancer, metastatic                                                            | Has severe pain, extreme fatigue, weight loss, and high anxiety.                                                                                                              | 0.451<br>(0.307-0.600)     |
| Terminal phase                                        | Terminal phase, with medication (for cancers, end-stage kidney/liver disease) | Has lost a lot of weight and regularly uses strong medication to avoid constant pain. The person has no appetite, feels nauseated, and needs to spend most of the day in bed. | 0.540<br>(0.377-0.687)     |
| Stoma due to colon and rectum cancer, beyond 10 years | Stoma                                                                         | Has a pouch attached to an opening in the belly to collect and empty stools.                                                                                                  | 0.095<br>(0.063 – 0.131)   |

GBD=Global Burden of Disease

**Appendix Table 4: Deaths of colorectal cancer in 1990 and 2017 for both sexes and percentage change of age-standardised rates by 195 countries and territories.**

|                                  | 1990                       |                      | 2017                       |                      | Percentage change in age-standardised rates between 1990 and 2017 |
|----------------------------------|----------------------------|----------------------|----------------------------|----------------------|-------------------------------------------------------------------|
|                                  | Counts (95% UI)            | Rate (95% UI)        | Counts (95% UI)            | Rate (95% UI)        |                                                                   |
| <b>Global</b>                    | 502869<br>(488388, 526175) | 13.3<br>(13, 13.9)   | 896040<br>(876279, 915720) | 11.5<br>(11.3, 11.8) | -13.5<br>(-18.4, -10)                                             |
| <b>High-income North America</b> | 75773<br>(75035, 76693)    | 20.5<br>(20.3, 20.8) | 89893<br>(87480, 92289)    | 14.4<br>(14, 14.8)   | -30<br>(-32.2, -27.8)                                             |
| <b>Canada</b>                    | 6637<br>(6497, 6785)       | 19.9<br>(19.5, 20.4) | 10145<br>(9454, 10779)     | 14.5<br>(13.5, 15.4) | -27.3<br>(-32.5, -22.4)                                           |
| <b>Greenland</b>                 | 11<br>(10, 12)             | 37<br>(32.9, 41.1)   | 16<br>(15, 18)             | 26.5<br>(24.2, 28.8) | -28.4<br>(-38.5, -17.3)                                           |
| <b>USA</b>                       | 69124<br>(68425, 70000)    | 20.6<br>(20.4, 20.9) | 79730<br>(77620, 82035)    | 14.4<br>(14, 14.8)   | -30.4<br>(-32.6, -28)                                             |
| <b>Australasia</b>               | 5500<br>(5392, 5613)       | 23<br>(22.6, 23.5)   | 7614<br>(7036, 8224)       | 15.2<br>(14, 16.4)   | -34<br>(-39.2, -28.6)                                             |
| <b>Australia</b>                 | 4374<br>(4274, 4476)       | 22<br>(21.5, 22.5)   | 6059<br>(5496, 6642)       | 14.4<br>(13, 15.8)   | -34.6<br>(-40.9, -28.2)                                           |
| <b>New Zealand</b>               | 1127<br>(1093, 1162)       | 28.2<br>(27.4, 29.1) | 1555<br>(1457, 1668)       | 19.7<br>(18.4, 21.1) | -30.3<br>(-35.2, -25.4)                                           |
| <b>High-income Asia-Pacific</b>  | 29995<br>(29642, 30375)    | 15.2<br>(15, 15.3)   | 68204<br>(65810, 71047)    | 14.1<br>(13.6, 14.7) | -7.1<br>(-10.4, -3.4)                                             |
| <b>Brunei</b>                    | 20<br>(17, 23)             | 20.6<br>(17.6, 23.7) | 62<br>(57, 68)             | 21.7<br>(19.7, 23.9) | 5.5<br>(-11.6, 24.5)                                              |
| <b>Japan</b>                     | 26786<br>(26471, 27148)    | 15.9<br>(15.7, 16.1) | 57307<br>(55396, 59567)    | 14.7<br>(14.2, 15.3) | -7.5<br>(-10.6, -3.9)                                             |
| <b>Singapore</b>                 | 433<br>(420, 447)          | 20.3<br>(19.6, 20.9) | 846<br>(785, 919)          | 12.7<br>(11.8, 13.8) | -37.5<br>(-42.2, -31.8)                                           |
| <b>South Korea</b>               | 2756<br>(2666, 2853)       | 9.8<br>(9.5, 10.2)   | 9989<br>(9142, 10833)      | 12<br>(11, 13)       | 21.8<br>(10.6, 32.9)                                              |
| <b>Western Europe</b>            | 121400<br>(120148, 122748) | 19.9<br>(19.7, 20.1) | 144456<br>(138821, 149986) | 14.7<br>(14.1, 15.3) | -26.1<br>(-29.1, -23.1)                                           |
| <b>Andorra</b>                   | 10<br>(8, 12)              | 18.1<br>(14.9, 21.8) | 21<br>(17, 24)             | 14.6<br>(11.8, 17.3) | -19.7<br>(-34.2, -3.8)                                            |
| <b>Austria</b>                   | 2718<br>(2650, 2786)       | 21.8<br>(21.3, 22.4) | 2384<br>(2230, 2543)       | 12.5<br>(11.7, 13.3) | -42.7<br>(-46.7, -38.8)                                           |
| <b>Belgium</b>                   | 3617<br>(3512, 3718)       | 22.4<br>(21.8, 23)   | 3605<br>(3337, 3885)       | 14.4<br>(13.4, 15.6) | -35.5<br>(-40.4, -30.2)                                           |
| <b>Cyprus</b>                    | 111<br>(98, 128)           | 13.1<br>(11.6, 15.1) | 214<br>(193, 238)          | 11.1<br>(10, 12.4)   | -15<br>(-28.9, 2)                                                 |
| <b>Denmark</b>                   | 1442<br>(1404, 1483)       | 16.9<br>(16.5, 17.3) | 2260<br>(2100, 2415)       | 19<br>(17.7, 20.4)   | 12.7<br>(4, 21.7)                                                 |
| <b>Finland</b>                   | 988<br>(962, 1013)         | 13.5<br>(13.1, 13.8) | 1366<br>(1275, 1464)       | 10.8<br>(10, 11.6)   | -20<br>(-25.8, -13.5)                                             |
| <b>France</b>                    | 18250<br>(17753, 18775)    | 20.5<br>(19.9, 21)   | 21135<br>(19529, 22794)    | 13.8<br>(12.7, 14.9) | -32.8<br>(-37.9, -26.8)                                           |
| <b>Germany</b>                   | 32150<br>(31358, 32904)    | 23.9<br>(23.3, 24.4) | 30911<br>(27874, 34210)    | 15.3<br>(13.8, 16.9) | -35.8<br>(-42.4, -28.6)                                           |

|                               |                         |                      |                         |                      |                         |
|-------------------------------|-------------------------|----------------------|-------------------------|----------------------|-------------------------|
| <b>Greece</b>                 | 1529<br>(1472, 1593)    | 9.8<br>(9.5, 10.2)   | 3150<br>(2923, 3374)    | 11.9<br>(11.1, 12.7) | 20.9<br>(11.8, 30.9)    |
| <b>Iceland</b>                | 42<br>(39, 44)          | 13.9<br>(13.2, 14.6) | 64<br>(60, 69)          | 11.5<br>(10.7, 12.3) | -17.3<br>(-24.1, -10.2) |
| <b>Ireland</b>                | 984<br>(953, 1016)      | 23.6<br>(22.9, 24.4) | 1164<br>(1061, 1283)    | 15.7<br>(14.3, 17.3) | -33.6<br>(-39.6, -27)   |
| <b>Israel</b>                 | 870<br>(836, 915)       | 17.9<br>(17.2, 18.8) | 1658<br>(1539, 1787)    | 14<br>(13, 15.1)     | -21.6<br>(-27.2, -15.4) |
| <b>Italy</b>                  | 16127<br>(15698, 16549) | 17.5<br>(17.1, 17.9) | 20982<br>(19498, 22621) | 13.3<br>(12.3, 14.3) | -24.2<br>(-29.8, -18.2) |
| <b>Luxembourg</b>             | 129<br>(123, 135)       | 22.8<br>(21.8, 23.8) | 162<br>(144, 188)       | 15.9<br>(14.1, 18.5) | -30<br>(-38.3, -19.1)   |
| <b>Malta</b>                  | 66<br>(62, 70)          | 15.6<br>(14.8, 16.4) | 132<br>(122, 142)       | 14.4<br>(13.3, 15.4) | -7.7<br>(-15.8, 0.2)    |
| <b>Netherlands</b>            | 4448<br>(4334, 4560)    | 21.4<br>(20.9, 21.9) | 6580<br>(6179, 7002)    | 18.8<br>(17.6, 20.1) | -12.1<br>(-17.9, -6.2)  |
| <b>Norway</b>                 | 1572<br>(1550, 1596)    | 21.9<br>(21.6, 22.3) | 1771<br>(1694, 1853)    | 17.9<br>(17.1, 18.7) | -18.5<br>(-22.3, -14.6) |
| <b>Portugal</b>               | 2678<br>(2590, 2759)    | 19.6<br>(19, 20.2)   | 4529<br>(4205, 4875)    | 17.8<br>(16.6, 19.2) | -9.2<br>(-16.3, -0.9)   |
| <b>Spain</b>                  | 9042<br>(8814, 9267)    | 16<br>(15.6, 16.4)   | 16955<br>(15815, 18236) | 16.1<br>(15, 17.3)   | 0.7<br>(-6.8, 8.7)      |
| <b>Sweden</b>                 | 2756<br>(2689, 2825)    | 17.1<br>(16.7, 17.5) | 3163<br>(2990, 3341)    | 14.3<br>(13.5, 15.1) | -16.2<br>(-21.2, -11)   |
| <b>Switzerland</b>            | 1000<br>(972, 1031)     | 9.1<br>(8.8, 9.3)    | 1859<br>(1712, 2023)    | 10.2<br>(9.4, 11.2)  | 12.9<br>(2.6, 23.6)     |
| <b>United Kingdom</b>         | 20755<br>(20510, 21014) | 21.7<br>(21.5, 22)   | 20242<br>(19811, 20684) | 15.1<br>(14.8, 15.5) | -30.3<br>(-32.1, -28.3) |
| <b>Southern Latin America</b> | 7253<br>(7083, 7432)    | 15.8<br>(15.5, 16.2) | 13402<br>(12431, 14491) | 16.1<br>(14.9, 17.4) | 1.5<br>(-6.4, 10.3)     |
| <b>Argentina</b>              | 5349<br>(5185, 5517)    | 16.6<br>(16.1, 17.1) | 9286<br>(8332, 10284)   | 17.1<br>(15.3, 19)   | 2.9<br>(-7.6, 14.8)     |
| <b>Chile</b>                  | 1033<br>(996, 1072)     | 10.7<br>(10.3, 11.1) | 2898<br>(2620, 3203)    | 12.5<br>(11.3, 13.8) | 16.3<br>(3.7, 30)       |
| <b>Uruguay</b>                | 870<br>(842, 898)       | 21.6<br>(21, 22.3)   | 1218<br>(1092, 1353)    | 21.1<br>(18.9, 23.5) | -2.5<br>(-13.1, 8.7)    |
| <b>Eastern Europe</b>         | 44989<br>(44037, 46443) | 15.8<br>(15.5, 16.3) | 57216<br>(55845, 58856) | 16.4<br>(16, 16.9)   | 3.9<br>(1.6, 6.5)       |
| <b>Belarus</b>                | 1928<br>(1876, 1985)    | 14.5<br>(14.2, 14.9) | 2428<br>(2219, 2762)    | 15<br>(13.7, 17)     | 3<br>(-6.2, 16.5)       |
| <b>Estonia</b>                | 358<br>(345, 371)       | 16.9<br>(16.3, 17.5) | 439<br>(380, 498)       | 15.3<br>(13.3, 17.4) | -9.5<br>(-21.7, 3.9)    |
| <b>Latvia</b>                 | 618<br>(600, 637)       | 16.6<br>(16.1, 17.1) | 714<br>(638, 801)       | 16.6<br>(14.8, 18.7) | 0.1<br>(-11.7, 13)      |
| <b>Lithuania</b>              | 708<br>(688, 727)       | 15.2<br>(14.7, 15.6) | 984<br>(912, 1051)      | 16<br>(14.9, 17.2)   | 5.7<br>(-2, 13.9)       |
| <b>Moldova</b>                | 701<br>(675, 726)       | 15.4<br>(14.9, 15.9) | 898<br>(847, 956)       | 15.7<br>(14.7, 16.7) | 1.6<br>(-5.1, 8.5)      |
| <b>Russia</b>                 | 28579<br>(27862, 29819) | 15.6<br>(15.2, 16.3) | 38591<br>(37903, 39269) | 16.4<br>(16.1, 16.7) | 5<br>(1.1, 8.4)         |



|                               |                         |                      |                         |                      |                         |
|-------------------------------|-------------------------|----------------------|-------------------------|----------------------|-------------------------|
| <b>Ukraine</b>                | 12097<br>(11725, 12485) | 16.4<br>(15.9, 16.9) | 13161<br>(12384, 14111) | 16.8<br>(15.8, 18)   | 2.5<br>(-3.9, 9.4)      |
| <b>Central Europe</b>         | 31145<br>(30745, 31541) | 20.9<br>(20.7, 21.2) | 45941<br>(44622, 47394) | 20.9<br>(20.3, 21.6) | -0.1<br>(-3.1, 3.4)     |
| <b>Albania</b>                | 138<br>(127, 169)       | 6.4<br>(5.8, 8.1)    | 293<br>(239, 359)       | 7.1<br>(5.8, 8.6)    | 11.2<br>(-9.8, 36.4)    |
| <b>Bosnia and Herzegovina</b> | 524<br>(490, 614)       | 13.4<br>(12.5, 15.8) | 1215<br>(1114, 1328)    | 20.4<br>(18.8, 22.2) | 52.4<br>(36.1, 67.5)    |
| <b>Bulgaria</b>               | 2119<br>(2049, 2192)    | 16.7<br>(16.1, 17.2) | 2914<br>(2709, 3113)    | 19.2<br>(17.9, 20.5) | 15.5<br>(6.7, 23.8)     |
| <b>Croatia</b>                | 1390<br>(1345, 1441)    | 22<br>(21.3, 22.7)   | 2181<br>(2037, 2339)    | 23.7<br>(22.2, 25.4) | 8<br>(0.2, 16.3)        |
| <b>Czech Republic</b>         | 4690<br>(4562, 4806)    | 33.4<br>(32.5, 34.2) | 4411<br>(4135, 4713)    | 20.6<br>(19.3, 22)   | -38.3<br>(-42.6, -33.4) |
| <b>Hungary</b>                | 4493<br>(4372, 4607)    | 29.9<br>(29.2, 30.7) | 5194<br>(4864, 5526)    | 26.1<br>(24.5, 27.8) | -12.6<br>(-18.2, -6.8)  |
| <b>Macedonia</b>              | 222<br>(207, 250)       | 12.1<br>(11.2, 13.9) | 511<br>(454, 571)       | 15<br>(13.4, 16.8)   | 24.4<br>(3.4, 42.8)     |
| <b>Montenegro</b>             | 84<br>(76, 92)          | 13.7<br>(12.4, 15)   | 146<br>(132, 162)       | 14.5<br>(13.2, 16.1) | 6.1<br>(-6.5, 20.8)     |
| <b>Poland</b>                 | 9668<br>(9400, 9935)    | 21.5<br>(21, 22.1)   | 15486<br>(14506, 16534) | 21.6<br>(20.2, 23.1) | 0.5<br>(-6.3, 7.7)      |
| <b>Romania</b>                | 3445<br>(3339, 3554)    | 12.2<br>(11.8, 12.5) | 6651<br>(6248, 7088)    | 17.6<br>(16.5, 18.7) | 44.1<br>(35.2, 54.3)    |
| <b>Serbia</b>                 | 2439<br>(2237, 2685)    | 21.9<br>(20.2, 24.1) | 3863<br>(3582, 4156)    | 23.9<br>(22.1, 25.8) | 9<br>(-1.8, 20)         |
| <b>Slovakia</b>               | 1392<br>(1336, 1449)    | 22.9<br>(22, 23.8)   | 2222<br>(1987, 2404)    | 24.5<br>(21.9, 26.4) | 6.7<br>(-6.2, 16.9)     |
| <b>Slovenia</b>               | 541<br>(521, 564)       | 21.9<br>(21.1, 22.8) | 852<br>(790, 922)       | 19<br>(17.6, 20.6)   | -13.4<br>(-20.7, -5.5)  |
| <b>Central Asia</b>           | 4124<br>(4053, 4203)    | 8.7<br>(8.5, 8.9)    | 6105<br>(5822, 6372)    | 9<br>(8.6, 9.4)      | 3.7<br>(-0.6, 7.9)      |
| <b>Armenia</b>                | 303<br>(289, 319)       | 11.2<br>(10.6, 11.7) | 529<br>(500, 557)       | 12.8<br>(12.1, 13.4) | 14.3<br>(6.3, 22.5)     |
| <b>Azerbaijan</b>             | 406<br>(383, 429)       | 7.9<br>(7.4, 8.3)    | 780<br>(668, 885)       | 9<br>(7.8, 10.2)     | 14.9<br>(-1.3, 32)      |
| <b>Georgia</b>                | 507<br>(481, 535)       | 8.2<br>(7.7, 8.6)    | 634<br>(585, 679)       | 10.7<br>(9.9, 11.4)  | 31<br>(21.1, 41.5)      |
| <b>Kazakhstan</b>             | 1531<br>(1481, 1583)    | 11.9<br>(11.5, 12.3) | 1807<br>(1677, 1955)    | 11.3<br>(10.5, 12.2) | -5.2<br>(-11.7, 1.2)    |
| <b>Kyrgyzstan</b>             | 299<br>(283, 318)       | 9.9<br>(9.3, 10.5)   | 269<br>(249, 300)       | 6.5<br>(6.1, 7.2)    | -33.8<br>(-39.5, -26.1) |
| <b>Mongolia</b>               | 80<br>(72, 89)          | 7.7<br>(7, 8.7)      | 135<br>(117, 153)       | 6.8<br>(5.9, 7.7)    | -11.7<br>(-27.4, 4.3)   |
| <b>Tajikistan</b>             | 187<br>(177, 197)       | 6.4<br>(6.1, 6.8)    | 328<br>(296, 367)       | 6.8<br>(6.1, 7.5)    | 5.5<br>(-5.4, 17)       |
| <b>Turkmenistan</b>           | 121<br>(115, 127)       | 6.2<br>(5.9, 6.6)    | 253<br>(232, 274)       | 7.5<br>(6.9, 8.2)    | 21.2<br>(9.1, 33.6)     |
| <b>Uzbekistan</b>             | 691<br>(664, 716)       | 5.9<br>(5.6, 6.1)    | 1368<br>(1216, 1522)    | 7.4<br>(6.7, 8.3)    | 26.8<br>(13.5, 40.6)    |

|                              |                      |                      |                         |                      |                       |
|------------------------------|----------------------|----------------------|-------------------------|----------------------|-----------------------|
| <b>Central Latin America</b> | 5441<br>(5358, 5544) | 6.7<br>(6.6, 6.8)    | 18272<br>(17589, 18925) | 8<br>(7.7, 8.3)      | 20.4<br>(15, 25.4)    |
| <b>Colombia</b>              | 1421<br>(1375, 1473) | 8.5<br>(8.2, 8.8)    | 4413<br>(3979, 4918)    | 8.2<br>(7.4, 9.1)    | -3.7<br>(-13.6, 7.9)  |
| <b>Costa Rica</b>            | 161<br>(154, 167)    | 9.4<br>(9, 9.8)      | 642<br>(581, 698)       | 13.2<br>(11.9, 14.3) | 40.5<br>(25.5, 54.8)  |
| <b>El Salvador</b>           | 148<br>(138, 160)    | 5<br>(4.7, 5.5)      | 495<br>(419, 578)       | 8.6<br>(7.3, 10.1)   | 71<br>(40.3, 100.9)   |
| <b>Guatemala</b>             | 156<br>(149, 163)    | 4.7<br>(4.5, 4.9)    | 687<br>(619, 757)       | 6.6<br>(5.9, 7.3)    | 40.5<br>(24.5, 57.5)  |
| <b>Honduras</b>              | 105<br>(92, 118)     | 5.1<br>(4.4, 5.7)    | 409<br>(313, 501)       | 7.1<br>(5.5, 8.7)    | 38.2<br>(7.4, 73.6)   |
| <b>Mexico</b>                | 2448<br>(2400, 2505) | 5.8<br>(5.7, 5.9)    | 8471<br>(8172, 8704)    | 7.6<br>(7.3, 7.8)    | 31.6<br>(25.3, 36)    |
| <b>Nicaragua</b>             | 86<br>(79, 94)       | 5.5<br>(5.1, 6)      | 294<br>(260, 333)       | 6.6<br>(5.8, 7.5)    | 19.4<br>(2.5, 38.4)   |
| <b>Panama</b>                | 127<br>(121, 133)    | 8.7<br>(8.3, 9.2)    | 369<br>(340, 399)       | 9.3<br>(8.5, 10)     | 6.4<br>(-3.2, 16.6)   |
| <b>Venezuela</b>             | 788<br>(760, 817)    | 8.4<br>(8.1, 8.7)    | 2491<br>(2161, 2854)    | 9.3<br>(8, 10.7)     | 10.7<br>(-5.1, 28.2)  |
| <b>Andean Latin America</b>  | 1425<br>(1293, 1628) | 7.2<br>(6.6, 8.2)    | 4352<br>(3952, 4733)    | 8.2<br>(7.4, 8.9)    | 13.3<br>(-1.7, 28.7)  |
| <b>Bolivia</b>               | 293<br>(183, 472)    | 9.8<br>(6.3, 15.6)   | 844<br>(620, 1122)      | 10.5<br>(7.8, 13.9)  | 7.2<br>(-23.1, 47.3)  |
| <b>Ecuador</b>               | 354<br>(342, 368)    | 6.8<br>(6.6, 7.1)    | 1243<br>(1137, 1364)    | 8.7<br>(7.9, 9.5)    | 27<br>(14.4, 41.1)    |
| <b>Peru</b>                  | 777<br>(716, 842)    | 6.7<br>(6.2, 7.3)    | 2266<br>(1942, 2616)    | 7.4<br>(6.3, 8.5)    | 10<br>(-7.6, 30)      |
| <b>Caribbean</b>             | 3153<br>(3040, 3335) | 12.3<br>(11.9, 13)   | 6735<br>(6263, 7276)    | 13.3<br>(12.3, 14.3) | 7.6<br>(1.3, 14.4)    |
| <b>Antigua and Barbuda</b>   | 5<br>(5, 6)          | 10.2<br>(9.6, 11)    | 11<br>(10, 12)          | 11.6<br>(10.6, 12.6) | 13<br>(1.5, 25.3)     |
| <b>The Bahamas</b>           | 23<br>(21, 24)       | 14.9<br>(13.9, 15.9) | 55<br>(50, 61)          | 15.7<br>(14.1, 17.4) | 5.2<br>(-7.8, 20.3)   |
| <b>Barbados</b>              | 49<br>(46, 52)       | 15.7<br>(14.8, 16.6) | 89<br>(81, 97)          | 18.2<br>(16.5, 19.8) | 16.3<br>(3.4, 28.8)   |
| <b>Belize</b>                | 6<br>(5, 7)          | 6.5<br>(5.9, 7.1)    | 21<br>(19, 22)          | 8.3<br>(7.6, 9)      | 26.6<br>(11.6, 41.2)  |
| <b>Bermuda</b>               | 14<br>(13, 14)       | 22<br>(20.5, 23.5)   | 21<br>(19, 23)          | 16.1<br>(14.7, 17.8) | -26.7<br>(-35, -16.3) |
| <b>Cuba</b>                  | 1526<br>(1480, 1570) | 14.8<br>(14.3, 15.2) | 2953<br>(2643, 3294)    | 15.4<br>(13.8, 17.2) | 4.4<br>(-6.2, 16.3)   |
| <b>Dominica</b>              | 7<br>(7, 8)          | 9.4<br>(8.8, 10.1)   | 11<br>(10, 12)          | 11.7<br>(10.7, 12.7) | 23.5<br>(9.3, 37.7)   |
| <b>Dominican Republic</b>    | 240<br>(222, 260)    | 6.6<br>(6.1, 7.1)    | 834<br>(717, 956)       | 9.2<br>(7.9, 10.6)   | 39.7<br>(16.8, 63.1)  |
| <b>Grenada</b>               | 9<br>(9, 10)         | 12.8<br>(12, 13.6)   | 21<br>(19, 23)          | 13<br>(11.9, 14)     | 1<br>(-8.8, 11.3)     |
| <b>Guyana</b>                | 35<br>(33, 37)       | 9.4<br>(8.9, 9.9)    | 58<br>(51, 65)          | 10.2<br>(9, 11.4)    | 8.3<br>(-5.4, 23.8)   |

|                                         |                         |                      |                            |                      |                         |
|-----------------------------------------|-------------------------|----------------------|----------------------------|----------------------|-------------------------|
| <b>Haiti</b>                            | 309<br>(221, 478)       | 10.6<br>(7.9, 15.8)  | 700<br>(509, 1015)         | 11.9<br>(8.8, 16.8)  | 11.7<br>(-9.6, 41.5)    |
| <b>Jamaica</b>                          | 196<br>(184, 209)       | 10.6<br>(10, 11.3)   | 414<br>(352, 478)          | 14.2<br>(12, 16.4)   | 34.3<br>(11.5, 58.5)    |
| <b>Puerto Rico</b>                      | 452<br>(435, 469)       | 12.2<br>(11.7, 12.7) | 930<br>(866, 995)          | 12.9<br>(12, 13.9)   | 6.2<br>(-1.6, 14.1)     |
| <b>Saint Lucia</b>                      | 9<br>(9, 10)            | 10.4<br>(9.7, 11)    | 20<br>(19, 22)             | 9.8<br>(9, 10.6)     | -5.4<br>(-14.1, 4)      |
| <b>Saint Vincent and the Grenadines</b> | 8<br>(7, 8)             | 10.5<br>(9.8, 11.2)  | 16<br>(15, 17)             | 11.6<br>(10.6, 12.6) | 10.5<br>(-1.4, 23.8)    |
| <b>Suriname</b>                         | 27<br>(25, 29)          | 11.2<br>(10.5, 12)   | 78<br>(70, 87)             | 14.1<br>(12.7, 15.6) | 25.8<br>(11, 42.7)      |
| <b>Trinidad and Tobago</b>              | 114<br>(109, 121)       | 13.9<br>(13.2, 14.6) | 216<br>(180, 256)          | 12.3<br>(10.2, 14.6) | -11.2<br>(-26.4, 6.3)   |
| <b>Virgin Islands</b>                   | 16<br>(15, 18)          | 20.6<br>(18.7, 22.6) | 42<br>(36, 48)             | 23.3<br>(20.2, 26.3) | 13.3<br>(-5.1, 31.8)    |
| <b>Tropical Latin America</b>           | 7428<br>(7255, 7637)    | 8.7<br>(8.5, 8.9)    | 23374<br>(22683, 24019)    | 10.3<br>(10, 10.6)   | 18.2<br>(12.9, 22.6)    |
| <b>Brazil</b>                           | 7293<br>(7122, 7501)    | 8.8<br>(8.5, 9)      | 22851<br>(22188, 23506)    | 10.3<br>(10, 10.6)   | 17.4<br>(12.2, 21.9)    |
| <b>Paraguay</b>                         | 135<br>(123, 147)       | 6.5<br>(5.9, 7.1)    | 522<br>(437, 619)          | 10.4<br>(8.7, 12.3)  | 59.5<br>(29.8, 92.8)    |
| <b>East Asia</b>                        | 80464<br>(75923, 88259) | 9.4<br>(8.9, 10.3)   | 199982<br>(189925, 208686) | 10.3<br>(9.8, 10.7)  | 9.5<br>(-3.7, 19.6)     |
| <b>China</b>                            | 75876<br>(71332, 83540) | 9.3<br>(8.8, 10.3)   | 187078<br>(177047, 195514) | 10.1<br>(9.6, 10.6)  | 8.2<br>(-5.6, 18.6)     |
| <b>North Korea</b>                      | 1394<br>(1129, 1687)    | 8.9<br>(7.3, 10.7)   | 2910<br>(2352, 3516)       | 9.5<br>(7.7, 11.4)   | 6.8<br>(-16.2, 37.8)    |
| <b>Taiwan (Province of China)</b>       | 1852<br>(1809, 1898)    | 12.2<br>(11.9, 12.5) | 6773<br>(6398, 7196)       | 17.7<br>(16.7, 18.8) | 45.1<br>(36.3, 54.3)    |
| <b>Southeast Asia</b>                   | 22038<br>(19071, 26703) | 9.3<br>(8.1, 11.1)   | 55681<br>(52786, 59309)    | 10.3<br>(9.8, 11)    | 11<br>(-8.1, 28.3)      |
| <b>Cambodia</b>                         | 506<br>(300, 893)       | 11.8<br>(7.2, 20.4)  | 1152<br>(869, 1530)        | 11.2<br>(8.6, 14.7)  | -5<br>(-33, 40.1)       |
| <b>Indonesia</b>                        | 6487<br>(5443, 8189)    | 7.1<br>(6, 8.9)      | 14064<br>(13101, 15267)    | 7.6<br>(7.1, 8.3)    | 6.9<br>(-17.8, 29.6)    |
| <b>Laos</b>                             | 224<br>(140, 364)       | 11.4<br>(7.4, 18.2)  | 393<br>(308, 519)          | 10.2<br>(8.1, 13.4)  | -10.5<br>(-34.2, 26)    |
| <b>Malaysia</b>                         | 1462<br>(1242, 1757)    | 18.2<br>(15.1, 21.8) | 3707<br>(3249, 4191)       | 16.6<br>(14.6, 18.7) | -8.8<br>(-26.5, 8)      |
| <b>Maldives</b>                         | 6<br>(4, 9)             | 6.8<br>(4.8, 10.2)   | 14<br>(12, 16)             | 5.1<br>(4.4, 5.7)    | -25.1<br>(-54.2, 10.8)  |
| <b>Mauritius</b>                        | 51<br>(48, 54)          | 7.4<br>(7, 7.8)      | 175<br>(161, 189)          | 11.1<br>(10.2, 12)   | 49.9<br>(36, 65.4)      |
| <b>Myanmar</b>                          | 2950<br>(1709, 4861)    | 13.4<br>(8, 21.8)    | 5185<br>(3912, 7136)       | 12.5<br>(9.5, 17.2)  | -7<br>(-29.5, 35.9)     |
| <b>Philippines</b>                      | 1584<br>(1483, 1678)    | 5.6<br>(5.3, 5.9)    | 9007<br>(7875, 10206)      | 13.4<br>(11.8, 15.1) | 139.8<br>(109.4, 176.2) |
| <b>Sri Lanka</b>                        | 490<br>(456, 528)       | 4.9<br>(4.5, 5.3)    | 1312<br>(1029, 1567)       | 5.8<br>(4.5, 6.9)    | 18.4<br>(-7.6, 45.7)    |

|                                       |                         |                      |                         |                      |                         |
|---------------------------------------|-------------------------|----------------------|-------------------------|----------------------|-------------------------|
| <b>Seychelles</b>                     | 7<br>(6, 8)             | 12<br>(10.9, 14.4)   | 22<br>(20, 24)          | 21.9<br>(19.7, 23.8) | 82.9<br>(40.7, 107.9)   |
| <b>Thailand</b>                       | 3452<br>(3175, 3813)    | 10.1<br>(9.3, 11.1)  | 8445<br>(7641, 9362)    | 8.8<br>(8, 9.8)      | -12.5<br>(-25.3, -0.2)  |
| <b>East Timor</b>                     | 17<br>(13, 27)          | 6.9<br>(5.3, 10)     | 63<br>(50, 81)          | 8.6<br>(7, 11)       | 25.6<br>(-9.5, 68.7)    |
| <b>Vietnam</b>                        | 4773<br>(4134, 5455)    | 12.2<br>(10.6, 13.8) | 12068<br>(10561, 13786) | 13.9<br>(12.3, 15.8) | 14.6<br>(-7.3, 39.6)    |
| <b>Oceania</b>                        | 239<br>(198, 349)       | 8.9<br>(7.6, 12.4)   | 546<br>(457, 760)       | 9.3<br>(8.1, 12.3)   | 5.4<br>(-8.8, 20.1)     |
| <b>American Samoa</b>                 | 3<br>(2, 3)             | 13<br>(11.6, 14.5)   | 5<br>(4, 5)             | 12.7<br>(11.3, 14.1) | -2.8<br>(-17.5, 15.1)   |
| <b>Federated States of Micronesia</b> | 5<br>(4, 7)             | 11.1<br>(9.1, 14.2)  | 7<br>(5, 9)             | 11.6<br>(9.4, 14)    | 4.6<br>(-13.6, 26.1)    |
| <b>Fiji</b>                           | 26<br>(22, 31)          | 8<br>(6.9, 9.4)      | 59<br>(49, 68)          | 9.4<br>(7.8, 10.7)   | 17.2<br>(-7.5, 44.7)    |
| <b>Guam</b>                           | 9<br>(8, 10)            | 12.6<br>(11.3, 14.1) | 23<br>(20, 25)          | 13.3<br>(12, 14.8)   | 5.1<br>(-10.7, 25.2)    |
| <b>Kiribati</b>                       | 3<br>(3, 3)             | 9<br>(8, 10.1)       | 6<br>(5, 7)             | 9.6<br>(7.9, 11.2)   | 6.1<br>(-15.7, 29.7)    |
| <b>Marshall Islands</b>               | 2<br>(1, 3)             | 12.6<br>(9.6, 17.8)  | 4<br>(3, 5)             | 14.1<br>(11.5, 17.9) | 11.8<br>(-6.6, 35.7)    |
| <b>Northern Mariana Islands</b>       | 2<br>(1, 2)             | 11.5<br>(9.9, 13.7)  | 4<br>(4, 5)             | 9.6<br>(8.6, 10.8)   | -16.6<br>(-31.5, 0.4)   |
| <b>Papua New Guinea</b>               | 147<br>(111, 235)       | 8.3<br>(6.6, 12.9)   | 351<br>(270, 550)       | 8.6<br>(6.9, 13)     | 4.3<br>(-13.7, 25.6)    |
| <b>Samoa</b>                          | 7<br>(6, 9)             | 8.8<br>(7.2, 11)     | 11<br>(9, 13)           | 8.8<br>(7.3, 10.6)   | 0.4<br>(-20.7, 26.1)    |
| <b>Solomon Islands</b>                | 9<br>(7, 14)            | 7.2<br>(5.6, 10.6)   | 23<br>(19, 30)          | 8<br>(6.6, 10.4)     | 11.6<br>(-9.3, 34.1)    |
| <b>Tonga</b>                          | 3<br>(3, 4)             | 7.2<br>(6.4, 8.3)    | 6<br>(5, 7)             | 7.6<br>(6.4, 8.8)    | 5.2<br>(-18, 29.9)      |
| <b>Vanuatu</b>                        | 7<br>(5, 9)             | 10.5<br>(8.2, 14.6)  | 18<br>(13, 24)          | 11.6<br>(9, 15.4)    | 10.9<br>(-15.1, 41.1)   |
| <b>North Africa and Middle East</b>   | 12511<br>(10704, 16105) | 7.6<br>(6.5, 9.7)    | 31342<br>(29922, 32855) | 8<br>(7.6, 8.3)      | 4.2<br>(-19.1, 22.8)    |
| <b>Afghanistan</b>                    | 692<br>(298, 1542)      | 10.2<br>(4.7, 21.6)  | 1249<br>(713, 2330)     | 12<br>(7.4, 20.8)    | 18<br>(-11, 85.8)       |
| <b>Algeria</b>                        | 711<br>(630, 794)       | 6.1<br>(5.4, 6.8)    | 1915<br>(1683, 2122)    | 6.1<br>(5.4, 6.8)    | 0.9<br>(-17.2, 19.4)    |
| <b>Bahrain</b>                        | 17<br>(14, 19)          | 9.7<br>(8.3, 11.5)   | 57<br>(50, 64)          | 7<br>(6.3, 7.9)      | -27.4<br>(-40.1, -8.1)  |
| <b>Egypt</b>                          | 1196<br>(1110, 1315)    | 4.4<br>(4.1, 4.9)    | 2880<br>(2354, 3313)    | 5.3<br>(4.3, 6.1)    | 20.8<br>(-5.6, 44.1)    |
| <b>Iran</b>                           | 1659<br>(1427, 2034)    | 6.9<br>(6, 8.4)      | 5592<br>(4979, 5856)    | 8.5<br>(7.6, 8.9)    | 22.6<br>(-3, 44.7)      |
| <b>Iraq</b>                           | 527<br>(427, 663)       | 7.1<br>(5.8, 8.8)    | 982<br>(893, 1067)      | 4.5<br>(4.1, 4.9)    | -36.3<br>(-50.1, -19.4) |
| <b>Jordan</b>                         | 139<br>(113, 167)       | 10<br>(8.1, 11.8)    | 535<br>(447, 621)       | 10.3<br>(8.6, 11.9)  | 3<br>(-22.8, 34.7)      |

|                                    |                         |                      |                         |                      |                        |
|------------------------------------|-------------------------|----------------------|-------------------------|----------------------|------------------------|
| <b>Kuwait</b>                      | 34<br>(32, 37)          | 5.4<br>(5.1, 5.9)    | 131<br>(114, 155)       | 5.7<br>(4.9, 6.6)    | 4.6<br>(-8.5, 24.6)    |
| <b>Lebanon</b>                     | 286<br>(241, 335)       | 13.7<br>(11.6, 16.1) | 741<br>(620, 869)       | 13.1<br>(11, 15.3)   | -4.6<br>(-24.6, 17.5)  |
| <b>Libya</b>                       | 212<br>(172, 264)       | 11.4<br>(9.4, 14.1)  | 583<br>(496, 683)       | 13.2<br>(11.2, 15.4) | 16.2<br>(-12.8, 52.9)  |
| <b>Morocco</b>                     | 783<br>(671, 921)       | 5.6<br>(4.9, 6.6)    | 2016<br>(1642, 2407)    | 6.7<br>(5.5, 8)      | 19.3<br>(-11.9, 55.7)  |
| <b>Palestine</b>                   | 116<br>(92, 146)        | 13.1<br>(10.4, 16.4) | 296<br>(264, 325)       | 12.6<br>(11.2, 13.8) | -3.7<br>(-28.3, 27.9)  |
| <b>Oman</b>                        | 39<br>(31, 49)          | 6.1<br>(4.9, 7.7)    | 109<br>(90, 129)        | 6.5<br>(5.5, 7.6)    | 7<br>(-23.5, 41.3)     |
| <b>Qatar</b>                       | 12<br>(10, 15)          | 13.8<br>(11.6, 16.7) | 63<br>(53, 75)          | 9.6<br>(8.1, 11.2)   | -30.5<br>(-46.8, -9.5) |
| <b>Saudi Arabia</b>                | 337<br>(263, 440)       | 5.5<br>(4.3, 7.2)    | 1356<br>(1152, 1571)    | 9.3<br>(8, 10.5)     | 67.4<br>(19.1, 127.4)  |
| <b>Sudan</b>                       | 564<br>(373, 961)       | 6.3<br>(4.3, 10.3)   | 1209<br>(911, 1644)     | 7.1<br>(5.5, 9.6)    | 13.8<br>(-19.5, 63.4)  |
| <b>Syria</b>                       | 302<br>(251, 374)       | 5.8<br>(4.9, 7.2)    | 764<br>(633, 928)       | 6.4<br>(5.3, 7.8)    | 9.6<br>(-19.1, 40.8)   |
| <b>Tunisia</b>                     | 340<br>(300, 394)       | 7.4<br>(6.5, 8.6)    | 911<br>(719, 1126)      | 7.9<br>(6.2, 9.7)    | 6.1<br>(-23.5, 40)     |
| <b>Turkey</b>                      | 4181<br>(3346, 5391)    | 11.9<br>(9.6, 15.2)  | 8562<br>(7720, 9768)    | 9.9<br>(8.9, 11.3)   | -16.6<br>(-38.2, 4.1)  |
| <b>United Arab Emirates</b>        | 42<br>(30, 59)          | 11.4<br>(8, 15.9)    | 370<br>(296, 455)       | 13.1<br>(10.8, 15.6) | 14.7<br>(-23.6, 67)    |
| <b>Yemen</b>                       | 313<br>(175, 547)       | 6.6<br>(4, 10.9)     | 992<br>(706, 1432)      | 8.3<br>(6.1, 11.6)   | 26.8<br>(-11.9, 101.5) |
| <b>South Asia</b>                  | 32224<br>(28530, 38770) | 5.9<br>(5.2, 7)      | 86712<br>(77540, 93391) | 7.1<br>(6.4, 7.6)    | 20.4<br>(-6.2, 42.8)   |
| <b>Bangladesh</b>                  | 4476<br>(3701, 5683)    | 9.3<br>(7.8, 12)     | 8147<br>(6954, 9748)    | 7.1<br>(6.1, 8.6)    | -23.3<br>(-42.2, -2.4) |
| <b>Bhutan</b>                      | 15<br>(11, 23)          | 6.6<br>(4.9, 9.5)    | 40<br>(30, 51)          | 7.1<br>(5.5, 9)      | 8.3<br>(-27.2, 57.5)   |
| <b>India</b>                       | 23879<br>(20895, 29179) | 5.5<br>(4.8, 6.7)    | 68596<br>(61647, 74084) | 7<br>(6.2, 7.5)      | 26<br>(-2.4, 50.5)     |
| <b>Nepal</b>                       | 501<br>(346, 770)       | 5.7<br>(4, 8.6)      | 1267<br>(1020, 1631)    | 6.4<br>(5.2, 8.3)    | 13.1<br>(-16.8, 52.1)  |
| <b>Pakistan</b>                    | 3352<br>(2996, 3708)    | 6<br>(5.3, 6.6)      | 8662<br>(6511, 10650)   | 8.5<br>(6.4, 10.3)   | 41.1<br>(6.4, 74.2)    |
| <b>Southern sub-Saharan Africa</b> | 2226<br>(2046, 2413)    | 8.5<br>(7.7, 9.3)    | 4824<br>(4423, 5138)    | 9.4<br>(8.6, 10)     | 10.8<br>(3.3, 18.1)    |
| <b>Botswana</b>                    | 45<br>(37, 54)          | 8.6<br>(7.2, 10.1)   | 107<br>(90, 133)        | 9.1<br>(7.7, 11)     | 5.7<br>(-18.1, 31.2)   |
| <b>Lesotho</b>                     | 65<br>(53, 87)          | 7.2<br>(6, 9.4)      | 110<br>(86, 138)        | 10.2<br>(8, 12.8)    | 42.1<br>(10.6, 78.4)   |
| <b>Namibia</b>                     | 52<br>(43, 67)          | 7.6<br>(6.3, 9.7)    | 103<br>(88, 121)        | 7.8<br>(6.6, 9.1)    | 1.7<br>(-25.9, 34)     |
| <b>South Africa</b>                | 1695<br>(1521, 1888)    | 8.4<br>(7.4, 9.4)    | 3757<br>(3338, 4056)    | 9.1<br>(8.1, 9.9)    | 9<br>(1.7, 16.8)       |

|                                   |                      |                      |                         |                     |                        |
|-----------------------------------|----------------------|----------------------|-------------------------|---------------------|------------------------|
| <b>Swaziland</b>                  | 27<br>(22, 34)       | 10.3<br>(8.6, 12.9)  | 61<br>(48, 76)          | 12.2<br>(9.7, 15)   | 18.7<br>(-9.3, 51.5)   |
| <b>Zimbabwe</b>                   | 343<br>(302, 388)    | 9<br>(7.9, 10.1)     | 687<br>(587, 805)       | 11.1<br>(9.5, 12.9) | 23.6<br>(3.9, 47.6)    |
| <b>Western sub-Saharan Africa</b> | 6615<br>(5380, 8667) | 8.2<br>(6.7, 10.8)   | 13259<br>(11407, 15582) | 8.4<br>(7.3, 9.8)   | 2.7<br>(-22.7, 31.1)   |
| <b>Benin</b>                      | 127<br>(102, 152)    | 6.6<br>(5.3, 7.9)    | 317<br>(255, 399)       | 7.6<br>(6.2, 9.5)   | 15.9<br>(-7.8, 47.6)   |
| <b>Burkina Faso</b>               | 478<br>(385, 557)    | 12.4<br>(10.2, 14.3) | 1009<br>(845, 1188)     | 13<br>(11, 15.2)    | 5.3<br>(-17, 35.6)     |
| <b>Cameroon</b>                   | 337<br>(284, 394)    | 8.4<br>(7.1, 9.7)    | 908<br>(667, 1154)      | 9.1<br>(6.8, 11.4)  | 8.7<br>(-15.4, 33.5)   |
| <b>Cape Verde</b>                 | 8<br>(7, 9)          | 3.5<br>(3.2, 3.9)    | 33<br>(30, 37)          | 7.4<br>(6.6, 8.1)   | 108.5<br>(80.7, 143.9) |
| <b>Chad</b>                       | 177<br>(137, 244)    | 6.5<br>(5.1, 8.9)    | 392<br>(299, 520)       | 8.1<br>(6.3, 10.7)  | 24.8<br>(3.8, 51.3)    |
| <b>Côte d'Ivoire</b>              | 198<br>(173, 224)    | 5.6<br>(5, 6.3)      | 494<br>(394, 622)       | 5.7<br>(4.6, 7)     | 0.6<br>(-22.7, 28.5)   |
| <b>The Gambia</b>                 | 19<br>(15, 22)       | 5.7<br>(4.8, 6.7)    | 54<br>(38, 71)          | 6.3<br>(4.5, 8.2)   | 9.9<br>(-28.2, 52.4)   |
| <b>Ghana</b>                      | 437<br>(360, 549)    | 7.8<br>(6.5, 9.6)    | 1166<br>(938, 1386)     | 8.7<br>(7, 10.2)    | 11.7<br>(-22.9, 47.7)  |
| <b>Guinea</b>                     | 193<br>(171, 215)    | 6<br>(5.4, 6.7)      | 376<br>(303, 474)       | 7.5<br>(6.1, 9.4)   | 24.6<br>(-1.6, 58.4)   |
| <b>Guinea-Bissau</b>              | 42<br>(23, 67)       | 11.3<br>(6.5, 17.7)  | 64<br>(45, 87)          | 10.6<br>(7.8, 14.1) | -6.7<br>(-30.6, 33.6)  |
| <b>Liberia</b>                    | 83<br>(66, 109)      | 7.7<br>(6.1, 10.1)   | 148<br>(110, 206)       | 8.7<br>(6.6, 12.1)  | 13.2<br>(-10.3, 41.6)  |
| <b>Mali</b>                       | 277<br>(247, 315)    | 7.5<br>(6.7, 8.4)    | 547<br>(400, 743)       | 7.3<br>(5.4, 9.8)   | -2.5<br>(-30.6, 35.7)  |
| <b>Mauritania</b>                 | 86<br>(64, 117)      | 8.8<br>(6.6, 12)     | 157<br>(120, 203)       | 8.7<br>(6.7, 11.2)  | -1.4<br>(-24.2, 34.8)  |
| <b>Niger</b>                      | 171<br>(118, 249)    | 6.8<br>(4.8, 9.7)    | 405<br>(294, 587)       | 6.5<br>(4.8, 9.3)   | -4.1<br>(-19.8, 14.3)  |
| <b>Nigeria</b>                    | 3473<br>(2400, 5192) | 8.5<br>(6, 12.6)     | 6162<br>(4559, 8246)    | 8.6<br>(6.5, 11.3)  | 0.7<br>(-32.7, 53)     |
| <b>São Tomé and Príncipe</b>      | 5<br>(5, 6)          | 8.3<br>(7.5, 9.4)    | 12<br>(9, 15)           | 12.8<br>(9.8, 16.5) | 52.9<br>(15.6, 100.2)  |
| <b>Senegal</b>                    | 277<br>(218, 359)    | 9.2<br>(7.3, 12)     | 520<br>(402, 643)       | 8<br>(6.2, 9.8)     | -12.7<br>(-41.1, 26)   |
| <b>Sierra Leone</b>               | 153<br>(110, 212)    | 8.1<br>(5.9, 11.3)   | 277<br>(211, 366)       | 9<br>(6.9, 11.9)    | 10.8<br>(-11.9, 39.4)  |
| <b>Togo</b>                       | 73<br>(59, 89)       | 6.5<br>(5.2, 7.8)    | 218<br>(169, 277)       | 7.4<br>(5.8, 9.2)   | 13.6<br>(-7, 37.3)     |
| <b>Eastern sub-Saharan Africa</b> | 7182<br>(5763, 9202) | 10.6<br>(8.7, 13.3)  | 14245<br>(13187, 15152) | 10.3<br>(9.5, 11)   | -2.9<br>(-22.7, 20.4)  |
| <b>Burundi</b>                    | 173<br>(132, 231)    | 8.8<br>(6.7, 11.5)   | 296<br>(234, 386)       | 8.3<br>(6.8, 10.6)  | -5.1<br>(-23.6, 18.9)  |
| <b>Comoros</b>                    | 22<br>(17, 29)       | 11.7<br>(9.4, 15.3)  | 47<br>(38, 57)          | 11.4<br>(9.4, 13.9) | -2.2<br>(-24.3, 27.9)  |

|                                   |                      |                      |                      |                      |                        |
|-----------------------------------|----------------------|----------------------|----------------------|----------------------|------------------------|
| <b>Djibouti</b>                   | 18<br>(11, 27)       | 13.3<br>(8.9, 19.7)  | 66<br>(45, 93)       | 13.6<br>(9.7, 18.7)  | 2.2<br>(-28.5, 50.8)   |
| <b>Eritrea</b>                    | 114<br>(81, 165)     | 13.1<br>(9.7, 18.6)  | 279<br>(217, 354)    | 13.9<br>(11.1, 17.2) | 5.8<br>(-22.9, 51)     |
| <b>Ethiopia</b>                   | 2392<br>(1332, 3581) | 14.5<br>(8.8, 21)    | 3973<br>(3518, 4380) | 11.4<br>(10.2, 12.6) | -20.9<br>(-46.2, 36.3) |
| <b>Kenya</b>                      | 600<br>(495, 738)    | 7.7<br>(6.3, 9.6)    | 1618<br>(1434, 1857) | 8.7<br>(7.7, 9.9)    | 12.4<br>(-2.3, 26.8)   |
| <b>Madagascar</b>                 | 486<br>(371, 666)    | 9.9<br>(7.6, 13.4)   | 898<br>(678, 1218)   | 9.6<br>(7.4, 12.8)   | -3.3<br>(-20.2, 18.1)  |
| <b>Malawi</b>                     | 187<br>(128, 226)    | 5.1<br>(3.6, 6)      | 405<br>(328, 484)    | 5.9<br>(4.8, 7)      | 15.9<br>(-9.9, 66.4)   |
| <b>Mozambique</b>                 | 667<br>(571, 770)    | 12.6<br>(10.7, 14.5) | 1332<br>(1101, 1607) | 14.1<br>(11.7, 16.9) | 12.1<br>(-15, 46.2)    |
| <b>Rwanda</b>                     | 225<br>(168, 301)    | 8.4<br>(6.3, 11.3)   | 392<br>(251, 527)    | 7.8<br>(5.1, 10.4)   | -7.9<br>(-29.8, 19.4)  |
| <b>Somalia</b>                    | 261<br>(138, 440)    | 11.4<br>(6.7, 18.5)  | 707<br>(456, 1092)   | 12.8<br>(8.5, 19.7)  | 12.5<br>(-16.8, 66.3)  |
| <b>South Sudan</b>                | 228<br>(140, 352)    | 10.5<br>(6.8, 15.7)  | 361<br>(254, 527)    | 10.8<br>(7.7, 15.7)  | 3.2<br>(-22.8, 45.1)   |
| <b>Tanzania</b>                   | 994<br>(779, 1235)   | 10.4<br>(8.5, 12.8)  | 2079<br>(1761, 2436) | 9.7<br>(8.3, 11.3)   | -6.3<br>(-28.6, 20.3)  |
| <b>Uganda</b>                     | 475<br>(404, 552)    | 7.7<br>(6.7, 8.9)    | 1122<br>(937, 1326)  | 9<br>(7.6, 10.6)     | 16.8<br>(-6.6, 45.7)   |
| <b>Zambia</b>                     | 337<br>(270, 412)    | 13.2<br>(10.9, 16)   | 662<br>(565, 760)    | 12<br>(10.3, 13.8)   | -9.2<br>(-31.2, 18.4)  |
| <b>Central sub-Saharan Africa</b> | 1745<br>(1388, 2306) | 8.7<br>(7.2, 11)     | 3885<br>(3296, 4744) | 8.8<br>(7.7, 10.3)   | 1<br>(-15.4, 20)       |
| <b>Angola</b>                     | 340<br>(226, 505)    | 9.6<br>(6.9, 13.7)   | 897<br>(729, 1090)   | 9.7<br>(7.9, 11.6)   | 0.3<br>(-29.7, 43.1)   |
| <b>Central African Republic</b>   | 102<br>(60, 165)     | 9.7<br>(6.3, 15.1)   | 185<br>(107, 307)    | 9.7<br>(6.2, 15.1)   | -0.2<br>(-20.2, 23.4)  |
| <b>Congo</b>                      | 119<br>(90, 155)     | 12<br>(9.6, 14.9)    | 261<br>(207, 329)    | 12.1<br>(9.7, 14.6)  | 1<br>(-21.5, 31.3)     |
| <b>DR Congo</b>                   | 1105<br>(883, 1424)  | 8<br>(6.6, 9.9)      | 2386<br>(1884, 3075) | 8.1<br>(6.6, 10)     | 0.9<br>(-18.3, 24.7)   |
| <b>Equatorial Guinea</b>          | 18<br>(11, 28)       | 10<br>(6.7, 15)      | 42<br>(28, 60)       | 10.3<br>(6.9, 14.4)  | 3.4<br>(-44.8, 73.4)   |
| <b>Gabon</b>                      | 62<br>(48, 80)       | 11.6<br>(9.4, 14.9)  | 114<br>(86, 143)     | 12<br>(8.9, 14.7)    | 2.7<br>(-26.2, 32.3)   |

**Appendix Table 5: DALYs of colorectal cancer in 1990 and 2017 for both sexes and percentage change of age-standardised rates by 195 countries and territories.**

|                                  | 1990                             |                         | 2017                             |                         | Percentage change in age-standardised rates between 1990 and 2017 |
|----------------------------------|----------------------------------|-------------------------|----------------------------------|-------------------------|-------------------------------------------------------------------|
|                                  | Counts (95% UI)                  | Rate (95% UI)           | Counts (95% UI)                  | Rate (95% UI)           |                                                                   |
| <b>Global</b>                    | 11538601<br>(11121326, 12222899) | 275.6<br>(265.9, 291)   | 18984324<br>(18498172, 19486073) | 235.7<br>(229.7, 242)   | -14.5<br>(-20.4, -10.3)                                           |
| <b>High-income North America</b> | 1509702<br>(1483445, 1540998)    | 432.4<br>(424.8, 441.3) | 1799369<br>(1740468, 1861903)    | 315.1<br>(304, 326.7)   | -27.1<br>(-30, -24.4)                                             |
| <b>Canada</b>                    | 133615<br>(130309, 137102)       | 406.7<br>(396.8, 416.9) | 186571<br>(174073, 200093)       | 293.5<br>(273.8, 314.5) | -27.8<br>(-33.1, -22.3)                                           |
| <b>Greenland</b>                 | 280<br>(252, 310)                | 751.7<br>(673.4, 833.4) | 363<br>(329, 397)                | 519.8<br>(472.8, 567.4) | -30.8<br>(-40.8, -19.9)                                           |
| <b>USA</b>                       | 1375774<br>(1351283, 1404620)    | 435.2<br>(427.4, 444)   | 1612404<br>(1556587, 1671285)    | 317.5<br>(306, 329.5)   | -27<br>(-30, -24.3)                                               |
| <b>Australasia</b>               | 117155<br>(114230, 120078)       | 495.3<br>(483, 507.5)   | 143424<br>(131344, 155933)       | 316<br>(288.5, 343.6)   | -36.2<br>(-41.7, -30.4)                                           |
| <b>Australia</b>                 | 93200<br>(90619, 95907)          | 472.2<br>(459.3, 485.3) | 115419<br>(103690, 127616)       | 302.9<br>(271.5, 336.1) | -35.9<br>(-42.3, -28.9)                                           |
| <b>New Zealand</b>               | 23956<br>(23178, 24811)          | 611.8<br>(591.8, 633.2) | 28005<br>(26066, 30096)          | 386.1<br>(359.4, 414.4) | -36.9<br>(-41.4, -32.3)                                           |
| <b>High-income Asia-Pacific</b>  | 676238<br>(663050, 691114)       | 324.4<br>(318.1, 331.5) | 1135282<br>(1085385, 1201298)    | 287.1<br>(274.3, 304.5) | -11.5<br>(-14.8, -7.4)                                            |
| <b>Brunei</b>                    | 518<br>(447, 614)                | 437.7<br>(373.2, 516.5) | 1706<br>(1554, 1873)             | 484.6<br>(443.1, 533.2) | 10.7<br>(-9, 31.8)                                                |
| <b>Japan</b>                     | 592074<br>(580303, 606043)       | 341.8<br>(335, 349.8)   | 910770<br>(871289, 959408)       | 303.9<br>(290.3, 321.2) | -11.1<br>(-14.3, -7.2)                                            |
| <b>Singapore</b>                 | 10456<br>(10109, 10835)          | 423<br>(409.2, 438.2)   | 18033<br>(16621, 19815)          | 258.2<br>(238.4, 283.5) | -39<br>(-43.8, -33)                                               |
| <b>South Korea</b>               | 73190<br>(70728, 75795)          | 216.7<br>(209.6, 224.2) | 204774<br>(186466, 223813)       | 242.1<br>(221.1, 264.6) | 11.7<br>(0.8, 22.6)                                               |
| <b>Western Europe</b>            | 2268290<br>(2231706, 2307130)    | 394<br>(387.8, 400.7)   | 2426173<br>(2321415, 2536376)    | 290<br>(277.3, 303.6)   | -26.4<br>(-29.5, -23.2)                                           |
| <b>Andorra</b>                   | 215<br>(175, 266)                | 360<br>(293.3, 443.1)   | 380<br>(303, 457)                | 288.6<br>(228.7, 347)   | -19.9<br>(-35.6, -1.7)                                            |
| <b>Austria</b>                   | 51252<br>(49764, 52753)          | 440.7<br>(428.4, 453.8) | 40531<br>(37671, 43436)          | 241.2<br>(224, 258.8)   | -45.3<br>(-49.3, -41.4)                                           |
| <b>Belgium</b>                   | 64056<br>(62178, 66160)          | 415.9<br>(404.2, 429.5) | 58975<br>(54510, 63722)          | 275<br>(254.3, 297.1)   | -33.9<br>(-38.9, -28.4)                                           |
| <b>Cyprus</b>                    | 2308<br>(2031, 2669)             | 269.8<br>(237.3, 311.9) | 4229<br>(3786, 4729)             | 227.1<br>(203.4, 254)   | -15.8<br>(-30.6, 2.7)                                             |
| <b>Denmark</b>                   | 27545<br>(26778, 28355)          | 350.9<br>(340.6, 361.4) | 39461<br>(36453, 42435)          | 362.4<br>(334.9, 389.9) | 3.3<br>(-4.8, 11.9)                                               |
| <b>Finland</b>                   | 19054<br>(18485, 19642)          | 267.1<br>(259.1, 275.5) | 24125<br>(22426, 26034)          | 216.4<br>(200.6, 234.7) | -19<br>(-25.3, -11.8)                                             |
| <b>France</b>                    | 320578<br>(311879, 330065)       | 388.7<br>(378.4, 399.7) | 331644<br>(305455, 359837)       | 264.8<br>(243.8, 288.9) | -31.9<br>(-37.4, -25.7)                                           |



|                               |                               |                         |                               |                         |                         |
|-------------------------------|-------------------------------|-------------------------|-------------------------------|-------------------------|-------------------------|
| <b>Germany</b>                | 599093<br>(584953, 614734)    | 472.4<br>(461.1, 484.3) | 528763<br>(474164, 586387)    | 305.7<br>(273.8, 339.2) | -35.3<br>(-42, -27.8)   |
| <b>Greece</b>                 | 28952<br>(27804, 30156)       | 189.2<br>(181.7, 197)   | 50520<br>(46864, 54363)       | 230.9<br>(214.3, 249.6) | 22.1<br>(12.7, 32.2)    |
| <b>Iceland</b>                | 804<br>(761, 847)             | 282.1<br>(267.5, 297.6) | 1146<br>(1065, 1231)          | 222.5<br>(206.5, 238.3) | -21.1<br>(-27.7, -14.1) |
| <b>Ireland</b>                | 19406<br>(18718, 20037)       | 474.9<br>(458.3, 490.8) | 21572<br>(19581, 24126)       | 303.3<br>(275.1, 339.5) | -36.1<br>(-42.1, -29)   |
| <b>Israel</b>                 | 16591<br>(15923, 17444)       | 336.8<br>(323.7, 354.1) | 28400<br>(26141, 30694)       | 261.6<br>(241.2, 282.8) | -22.3<br>(-28.3, -15.9) |
| <b>Italy</b>                  | 314644<br>(305889, 323828)    | 357.2<br>(347.1, 367.2) | 345224<br>(319024, 376298)    | 264.7<br>(244.4, 288.7) | -25.9<br>(-31.7, -19.6) |
| <b>Luxembourg</b>             | 2452<br>(2340, 2570)          | 442.9<br>(422.8, 464.4) | 2812<br>(2490, 3286)          | 299.2<br>(264.6, 350.5) | -32.5<br>(-40.9, -21.1) |
| <b>Malta</b>                  | 1324<br>(1256, 1399)          | 303.2<br>(287.9, 319.9) | 2391<br>(2210, 2588)          | 278.7<br>(257.7, 300)   | -8.1<br>(-15.9, -0.6)   |
| <b>Netherlands</b>            | 83813<br>(81528, 86305)       | 419.7<br>(408.5, 432.1) | 116910<br>(109358, 125154)    | 365.5<br>(341.8, 391.3) | -12.9<br>(-19, -6.7)    |
| <b>Norway</b>                 | 28697<br>(28125, 29266)       | 441.9<br>(432.8, 450.6) | 31032<br>(29534, 32786)       | 346.9<br>(329.8, 367.1) | -21.5<br>(-25.3, -17.2) |
| <b>Portugal</b>               | 52811<br>(51124, 54430)       | 382.8<br>(370.9, 394.3) | 77701<br>(71988, 84607)       | 359.2<br>(332.9, 392)   | -6.2<br>(-13.7, 3.2)    |
| <b>Spain</b>                  | 176861<br>(172312, 181803)    | 323.2<br>(314.9, 331.9) | 283313<br>(262905, 306025)    | 319.1<br>(295.6, 346.1) | -1.3<br>(-8.7, 7.1)     |
| <b>Sweden</b>                 | 49740<br>(48440, 51065)       | 344.8<br>(336.1, 353.9) | 53413<br>(50290, 56738)       | 279.8<br>(261.9, 297.2) | -18.9<br>(-23.8, -13.5) |
| <b>Switzerland</b>            | 19513<br>(18855, 20152)       | 191.8<br>(185.2, 198.1) | 32347<br>(29681, 35692)       | 202.2<br>(185.6, 224.1) | 5.4<br>(-4.1, 17)       |
| <b>United Kingdom</b>         | 386393<br>(379232, 393649)    | 434.1<br>(426.4, 442.2) | 348772<br>(338077, 360091)    | 298.4<br>(289.1, 308.4) | -31.3<br>(-33.3, -29.1) |
| <b>Southern Latin America</b> | 152213<br>(148748, 156040)    | 319.8<br>(312.4, 327.5) | 262320<br>(241353, 284521)    | 326.5<br>(300.2, 354.1) | 2.1<br>(-6.4, 11.7)     |
| <b>Argentina</b>              | 112689<br>(109366, 116151)    | 339.1<br>(329.2, 349.4) | 184956<br>(164823, 205907)    | 354.9<br>(315.5, 396)   | 4.7<br>(-6.5, 17.6)     |
| <b>Chile</b>                  | 22398<br>(21442, 23336)       | 213.5<br>(204.7, 222.4) | 56066<br>(50271, 62631)       | 243.2<br>(218, 271.6)   | 13.9<br>(1.1, 28.4)     |
| <b>Uruguay</b>                | 17120<br>(16535, 17711)       | 437.1<br>(422.5, 452.1) | 21286<br>(19015, 23792)       | 417.3<br>(372.1, 467.7) | -4.5<br>(-15.2, 7.2)    |
| <b>Eastern Europe</b>         | 1056513<br>(1030734, 1100691) | 365.7<br>(356.7, 381.2) | 1233374<br>(1198127, 1275464) | 367.7<br>(356.8, 380.9) | 0.5<br>(-1.9, 3.2)      |
| <b>Belarus</b>                | 45245<br>(43867, 46556)       | 342.1<br>(331.7, 352)   | 50267<br>(45745, 58162)       | 321.5<br>(292.5, 371.3) | -6<br>(-14.6, 8.1)      |
| <b>Estonia</b>                | 7797<br>(7514, 8103)          | 372.7<br>(359.3, 387.2) | 7718<br>(6652, 8869)          | 304.9<br>(261.3, 354.2) | -18.2<br>(-30.1, -5.5)  |
| <b>Latvia</b>                 | 13513<br>(13081, 13939)       | 367.6<br>(356.1, 378.8) | 12937<br>(11422, 14668)       | 338<br>(296.9, 383.3)   | -8<br>(-19.8, 4.9)      |
| <b>Lithuania</b>              | 15518<br>(15051, 16008)       | 335.1<br>(324.9, 345.5) | 18191<br>(16871, 19533)       | 334.3<br>(309.8, 359)   | -0.2<br>(-7.8, 7.3)     |

|                               |                            |                         |                            |                         |                         |
|-------------------------------|----------------------------|-------------------------|----------------------------|-------------------------|-------------------------|
| <b>Moldova</b>                | 18019<br>(17334, 18672)    | 380.8<br>(366.8, 393.9) | 21264<br>(19985, 22783)    | 375<br>(352.4, 401.2)   | -1.5<br>(-8.7, 5.7)     |
| <b>Russia</b>                 | 667525<br>(647818, 705118) | 356.2<br>(345.6, 376.4) | 825663<br>(808189, 843306) | 361.5<br>(353.8, 369.4) | 1.5<br>(-3.3, 5)        |
| <b>Ukraine</b>                | 288897<br>(279499, 298050) | 396.5<br>(383.9, 408.7) | 297334<br>(278528, 320404) | 402.5<br>(377.1, 434.5) | 1.5<br>(-4.9, 9)        |
| <b>Central Europe</b>         | 688352<br>(677404, 698606) | 451.7<br>(444.6, 458.2) | 890774<br>(862730, 919500) | 432.6<br>(418.9, 446.3) | -4.2<br>(-7.3, -0.7)    |
| <b>Albania</b>                | 3649<br>(3403, 4092)       | 152.6<br>(141.9, 177.3) | 6339<br>(5156, 7704)       | 159<br>(130.2, 193.2)   | 4.2<br>(-16.3, 27.6)    |
| <b>Bosnia and Herzegovina</b> | 13412<br>(12547, 15141)    | 303<br>(283.7, 346.1)   | 25028<br>(22891, 27275)    | 428.9<br>(392.6, 467.5) | 41.6<br>(26.6, 56.3)    |
| <b>Bulgaria</b>               | 50273<br>(48632, 51886)    | 391.1<br>(378.4, 403.1) | 59194<br>(54757, 63345)    | 430.6<br>(398.9, 461.7) | 10.1<br>(1.1, 18.7)     |
| <b>Croatia</b>                | 29608<br>(28597, 30722)    | 451.6<br>(436.9, 468)   | 39528<br>(37014, 42356)    | 468.3<br>(439, 501.5)   | 3.7<br>(-3.9, 11.7)     |
| <b>Czech Republic</b>         | 96834<br>(93887, 99258)    | 695.6<br>(674.3, 712.9) | 82259<br>(76705, 88302)    | 408.8<br>(381.5, 438.5) | -41.2<br>(-45.4, -36.1) |
| <b>Hungary</b>                | 92061<br>(89502, 94576)    | 614.7<br>(598.2, 631.1) | 100042<br>(93728, 106830)  | 545.1<br>(510.9, 582.2) | -11.3<br>(-17.1, -5.1)  |
| <b>Macedonia</b>              | 5484<br>(5118, 5914)       | 275.5<br>(257, 300.2)   | 11488<br>(10171, 12903)    | 343.8<br>(304.6, 385.7) | 24.8<br>(4.9, 42.8)     |
| <b>Montenegro</b>             | 1861<br>(1683, 2043)       | 287.3<br>(260.5, 313.6) | 2930<br>(2635, 3266)       | 294.9<br>(265.6, 328.3) | 2.6<br>(-9.2, 16.8)     |
| <b>Poland</b>                 | 209768<br>(203779, 215728) | 460.6<br>(448.1, 473.4) | 292727<br>(274072, 312103) | 433.8<br>(405.8, 463)   | -5.8<br>(-12.3, 1.1)    |
| <b>Romania</b>                | 84786<br>(81948, 87547)    | 293.7<br>(284.4, 303.1) | 135371<br>(127054, 144669) | 390.4<br>(367.1, 416.5) | 32.9<br>(24.2, 42.5)    |
| <b>Serbia</b>                 | 58145<br>(53166, 64485)    | 492.5<br>(451.9, 543.4) | 75937<br>(70329, 82173)    | 492.9<br>(454.9, 534.5) | 0.1<br>(-10.2, 10.4)    |
| <b>Slovakia</b>               | 31145<br>(29793, 32567)    | 512.3<br>(490.4, 536)   | 44977<br>(40500, 48963)    | 500.7<br>(451.8, 544.4) | -2.3<br>(-12.8, 7.5)    |
| <b>Slovenia</b>               | 11326<br>(10896, 11830)    | 450.7<br>(433.5, 470.3) | 14953<br>(13769, 16223)    | 368.1<br>(338.5, 400.2) | -18.3<br>(-25.1, -10.7) |
| <b>Central Asia</b>           | 111728<br>(109584, 114217) | 217<br>(213.1, 221.4)   | 149884<br>(142576, 158028) | 193.5<br>(184.4, 203.1) | -10.8<br>(-14.8, -6.7)  |
| <b>Armenia</b>                | 8215<br>(7802, 8654)       | 276.3<br>(262, 290.4)   | 11059<br>(10418, 11676)    | 268.3<br>(252.7, 282.9) | -2.9<br>(-9.7, 3.9)     |
| <b>Azerbaijan</b>             | 11715<br>(11018, 12496)    | 205.2<br>(193.4, 218)   | 20976<br>(17806, 24185)    | 207.8<br>(177.1, 237.2) | 1.3<br>(-13.4, 16)      |
| <b>Georgia</b>                | 13155<br>(12465, 13931)    | 207.1<br>(196.3, 219.1) | 13922<br>(12881, 14890)    | 249.1<br>(230.7, 265.8) | 20.3<br>(10.3, 30.7)    |
| <b>Kazakhstan</b>             | 39857<br>(38531, 41265)    | 287.6<br>(277.6, 297.9) | 42840<br>(39681, 46707)    | 244.8<br>(227.7, 265.8) | -14.9<br>(-21.1, -8.6)  |
| <b>Kyrgyzstan</b>             | 7946<br>(7492, 8438)       | 245.8<br>(231.9, 260.7) | 6712<br>(6176, 7641)       | 144<br>(132.9, 161.8)   | -41.4<br>(-47, -33.3)   |
| <b>Mongolia</b>               | 2092<br>(1899, 2324)       | 180.9<br>(164.3, 201.5) | 3832<br>(3295, 4320)       | 152.4<br>(131.4, 171.8) | -15.8<br>(-30.2, -1.5)  |

|                              |                            |                         |                            |                         |                         |
|------------------------------|----------------------------|-------------------------|----------------------------|-------------------------|-------------------------|
| <b>Tajikistan</b>            | 5379<br>(5028, 5747)       | 165<br>(155.5, 175)     | 9145<br>(8109, 10268)      | 150.8<br>(134.2, 168.8) | -8.6<br>(-19, 2)        |
| <b>Turkmenistan</b>          | 3565<br>(3390, 3746)       | 157.7<br>(149.6, 165.8) | 6286<br>(5772, 6835)       | 156.4<br>(143.8, 169.6) | -0.8<br>(-10.4, 9.5)    |
| <b>Uzbekistan</b>            | 19803<br>(19081, 20554)    | 150.9<br>(145.5, 156.4) | 35113<br>(30981, 39430)    | 149.8<br>(133, 167.3)   | -0.7<br>(-12, 11.2)     |
| <b>Central Latin America</b> | 132803<br>(130620, 135407) | 141.3<br>(139, 144.2)   | 421623<br>(404702, 437765) | 176.7<br>(169.5, 183.3) | 25<br>(19.4, 30.3)      |
| <b>Colombia</b>              | 34940<br>(33859, 36117)    | 178.1<br>(172.7, 184.3) | 97313<br>(86783, 109256)   | 181.1<br>(161.6, 203.2) | 1.7<br>(-9.3, 14)       |
| <b>Costa Rica</b>            | 3637<br>(3482, 3785)       | 192.6<br>(184.3, 200.5) | 13744<br>(12485, 14866)    | 277.2<br>(251.7, 300.2) | 43.9<br>(29.3, 58.1)    |
| <b>El Salvador</b>           | 3559<br>(3313, 3957)       | 110.1<br>(102.8, 121)   | 10839<br>(9040, 12875)     | 189.8<br>(158.1, 226)   | 72.4<br>(39.3, 106.4)   |
| <b>Guatemala</b>             | 4041<br>(3868, 4226)       | 98.2<br>(93.9, 102.7)   | 16611<br>(14812, 18562)    | 141.5<br>(126.7, 157.8) | 44.2<br>(27.6, 62.6)    |
| <b>Honduras</b>              | 2776<br>(2434, 3116)       | 116.8<br>(102, 130.9)   | 9699<br>(7197, 12136)      | 153.6<br>(115, 191.3)   | 31.6<br>(0.8, 68.1)     |
| <b>Mexico</b>                | 59298<br>(58139, 60752)    | 122<br>(119.7, 125.1)   | 199997<br>(192808, 206324) | 168.6<br>(162.8, 174)   | 38.2<br>(31.9, 42.7)    |
| <b>Nicaragua</b>             | 2221<br>(2025, 2444)       | 120.9<br>(110.3, 132.2) | 6652<br>(5841, 7604)       | 138.5<br>(121.8, 158)   | 14.6<br>(-2.3, 34)      |
| <b>Panama</b>                | 2883<br>(2748, 3027)       | 181.6<br>(173, 190.5)   | 7716<br>(7091, 8374)       | 194.8<br>(179, 211.5)   | 7.3<br>(-2.3, 18.1)     |
| <b>Venezuela</b>             | 19448<br>(18705, 20228)    | 179.9<br>(172.8, 186.6) | 59053<br>(50765, 68065)    | 203.4<br>(175.2, 234)   | 13.1<br>(-3.7, 31.2)    |
| <b>Andean Latin America</b>  | 33634<br>(30166, 38869)    | 150.2<br>(135.2, 172.7) | 91524<br>(82564, 100036)   | 167.3<br>(150.9, 183)   | 11.4<br>(-4.4, 28.3)    |
| <b>Bolivia</b>               | 7287<br>(4464, 11967)      | 207.8<br>(128.5, 336.8) | 18501<br>(13477, 24744)    | 209.5<br>(152.4, 279.8) | 0.8<br>(-29.7, 41.7)    |
| <b>Ecuador</b>               | 8090<br>(7793, 8397)       | 137.7<br>(132.5, 143.1) | 26076<br>(23477, 28833)    | 173.4<br>(156.4, 191.6) | 25.9<br>(12.7, 40.5)    |
| <b>Peru</b>                  | 18257<br>(16753, 19845)    | 140.1<br>(128.7, 152.3) | 46947<br>(40061, 54795)    | 152.6<br>(130.5, 178)   | 8.9<br>(-9.4, 29.9)     |
| <b>Caribbean</b>             | 68337<br>(65265, 73353)    | 251.9<br>(240.8, 270)   | 138301<br>(127898, 150530) | 272.4<br>(251.8, 296.4) | 8.1<br>(1.6, 15.2)      |
| <b>Antigua and Barbuda</b>   | 111<br>(104, 120)          | 214.7<br>(200.4, 230.7) | 234<br>(215, 254)          | 230.6<br>(211.1, 249.4) | 7.4<br>(-3.3, 19.2)     |
| <b>The Bahamas</b>           | 572<br>(528, 614)          | 334.2<br>(309.3, 358.3) | 1343<br>(1198, 1489)       | 343.4<br>(307.9, 380.3) | 2.8<br>(-10.8, 18.1)    |
| <b>Barbados</b>              | 923<br>(870, 975)          | 323.6<br>(306, 341.5)   | 1708<br>(1539, 1866)       | 365.7<br>(329.2, 400.5) | 13<br>(0.6, 25.9)       |
| <b>Belize</b>                | 129<br>(117, 141)          | 131<br>(118.8, 143.9)   | 508<br>(468, 553)          | 180.9<br>(166.6, 196.7) | 38<br>(21.9, 55.1)      |
| <b>Bermuda</b>               | 284<br>(265, 302)          | 439.5<br>(409.6, 467.5) | 366<br>(330, 405)          | 301.3<br>(271.1, 333.8) | -31.4<br>(-39.4, -21.1) |
| <b>Cuba</b>                  | 31441<br>(30492, 32447)    | 298<br>(289, 307.4)     | 55309<br>(49299, 61774)    | 302.8<br>(270, 337.8)   | 1.6<br>(-9.1, 13.7)     |

|                                         |                               |                         |                               |                         |                        |
|-----------------------------------------|-------------------------------|-------------------------|-------------------------------|-------------------------|------------------------|
| <b>Dominica</b>                         | 137<br>(127, 147)             | 193.9<br>(180.7, 207.7) | 214<br>(196, 233)             | 239.2<br>(218, 260.9)   | 23.3<br>(9.7, 37.5)    |
| <b>Dominican Republic</b>               | 5831<br>(5327, 6341)          | 138.6<br>(127.6, 150.4) | 19119<br>(16315, 22004)       | 202<br>(172.5, 232.5)   | 45.8<br>(20.6, 71.8)   |
| <b>Grenada</b>                          | 189<br>(176, 201)             | 272.5<br>(254.3, 290.1) | 398<br>(367, 431)             | 276.7<br>(255.1, 299.8) | 1.6<br>(-8.8, 12.5)    |
| <b>Guyana</b>                           | 878<br>(829, 927)             | 205.8<br>(194.2, 217.3) | 1478<br>(1297, 1677)          | 227<br>(199.9, 256.7)   | 10.3<br>(-4.1, 26.2)   |
| <b>Haiti</b>                            | 8207<br>(5722, 12937)         | 231.5<br>(164.6, 358)   | 17652<br>(12522, 26340)       | 246.4<br>(177, 359)     | 6.4<br>(-14.6, 38.8)   |
| <b>Jamaica</b>                          | 3748<br>(3511, 4021)          | 207.4<br>(194.5, 222.7) | 8914<br>(7447, 10429)         | 309.1<br>(258.1, 360.5) | 49.1<br>(21.8, 77)     |
| <b>Puerto Rico</b>                      | 9601<br>(9223, 9997)          | 258.8<br>(248.5, 269.5) | 17840<br>(16594, 19213)       | 283<br>(263.4, 304.5)   | 9.3<br>(0.8, 17.7)     |
| <b>Saint Lucia</b>                      | 200<br>(188, 211)             | 217<br>(204.9, 229.5)   | 431<br>(397, 470)             | 205.7<br>(189.3, 223.3) | -5.2<br>(-14, 4.9)     |
| <b>Saint Vincent and the Grenadines</b> | 161<br>(151, 172)             | 215.2<br>(201.1, 229.4) | 348<br>(318, 379)             | 257<br>(234.8, 279.7)   | 19.4<br>(6.5, 34.4)    |
| <b>Suriname</b>                         | 643<br>(595, 694)             | 236.1<br>(219.4, 254.2) | 1769<br>(1574, 1967)          | 298.6<br>(266.9, 331.9) | 26.5<br>(10.3, 44.3)   |
| <b>Trinidad and Tobago</b>              | 2570<br>(2446, 2707)          | 287.3<br>(273.1, 302.8) | 4817<br>(3966, 5792)          | 267.1<br>(219, 321.9)   | -7<br>(-23.9, 11.8)    |
| <b>Virgin Islands</b>                   | 375<br>(338, 413)             | 416.3<br>(376.9, 456.6) | 880<br>(751, 992)             | 481.3<br>(413.7, 542.4) | 15.6<br>(-3.6, 35.6)   |
| <b>Tropical Latin America</b>           | 183745<br>(179037, 189654)    | 183.3<br>(178.8, 188.9) | 535234<br>(518062, 551007)    | 225.5<br>(218.3, 232)   | 23<br>(17.2, 27.8)     |
| <b>Brazil</b>                           | 180751<br>(176115, 186696)    | 184.6<br>(180.2, 190.4) | 523766<br>(506827, 539532)    | 225.9<br>(218.6, 232.6) | 22.3<br>(16.5, 27.1)   |
| <b>Paraguay</b>                         | 2994<br>(2714, 3292)          | 127.3<br>(115.8, 139.6) | 11467<br>(9426, 13797)        | 210.2<br>(173, 252.1)   | 65<br>(32.5, 102.7)    |
| <b>East Asia</b>                        | 2247023<br>(2114932, 2455021) | 221.3<br>(208.5, 241.6) | 4539232<br>(4296171, 4749878) | 219.5<br>(207.8, 229.5) | -0.8<br>(-12.1, 8.6)   |
| <b>China</b>                            | 2123210<br>(1993440, 2327462) | 220.4<br>(206.8, 241.2) | 4254095<br>(4013807, 4465821) | 216.2<br>(203.9, 226.9) | -1.9<br>(-13.7, 7.8)   |
| <b>North Korea</b>                      | 38849<br>(31288, 47361)       | 214<br>(173.2, 259.1)   | 73129<br>(57895, 90993)       | 228.3<br>(181.6, 282.9) | 6.7<br>(-18.5, 40.2)   |
| <b>Taiwan (Province of China)</b>       | 47528<br>(46323, 48788)       | 272.6<br>(265.8, 279.5) | 138884<br>(130578, 148287)    | 372.3<br>(350.6, 397)   | 36.6<br>(28.2, 45.5)   |
| <b>Southeast Asia</b>                   | 595032<br>(512296, 729874)    | 205.9<br>(178.1, 250.7) | 1360792<br>(1286955, 1449817) | 221<br>(209.3, 235.4)   | 7.3<br>(-13, 25.6)     |
| <b>Cambodia</b>                         | 13967<br>(8105, 25166)        | 272.3<br>(161.1, 483.7) | 28983<br>(21523, 39397)       | 241.1<br>(180.6, 324.3) | -11.4<br>(-38.4, 33.3) |
| <b>Indonesia</b>                        | 187414<br>(157128, 237584)    | 163<br>(137.1, 205.9)   | 350920<br>(326310, 376313)    | 157.4<br>(146.7, 169.5) | -3.5<br>(-26.8, 18.6)  |
| <b>Laos</b>                             | 6248<br>(3764, 10458)         | 266.5<br>(163.8, 438.2) | 10360<br>(7818, 13951)        | 223.3<br>(172.1, 297.5) | -16.2<br>(-40.1, 22.7) |
| <b>Malaysia</b>                         | 34163<br>(29733, 41524)       | 351.7<br>(302.5, 424.1) | 83511<br>(73148, 95285)       | 322.1<br>(282.1, 366.2) | -8.4<br>(-26.5, 8.4)   |

|                                       |                            |                         |                            |                         |                         |
|---------------------------------------|----------------------------|-------------------------|----------------------------|-------------------------|-------------------------|
| <b>Maldives</b>                       | 164<br>(98, 263)           | 156.2<br>(100.2, 243.4) | 339<br>(296, 379)          | 105.3<br>(92.4, 117)    | -32.6<br>(-60.2, 10.7)  |
| <b>Mauritius</b>                      | 1272<br>(1201, 1342)       | 159.8<br>(151.3, 168.6) | 4013<br>(3679, 4381)       | 236.8<br>(217.3, 257.9) | 48.2<br>(34.2, 63.7)    |
| <b>Myanmar</b>                        | 81606<br>(46324, 137028)   | 314.7<br>(180.5, 523.7) | 127324<br>(94173, 176361)  | 270.4<br>(201.5, 372.8) | -14.1<br>(-37.1, 28.8)  |
| <b>Philippines</b>                    | 43963<br>(40988, 46550)    | 126<br>(117.6, 133.2)   | 245291<br>(212524, 278936) | 309.1<br>(268.8, 350.8) | 145.4<br>(111.1, 185.1) |
| <b>Sri Lanka</b>                      | 12347<br>(11523, 13243)    | 104.6<br>(97.7, 112.4)  | 28796<br>(22506, 35090)    | 116.1<br>(91, 140.7)    | 10.9<br>(-13.4, 38.7)   |
| <b>Seychelles</b>                     | 159<br>(144, 193)          | 273.8<br>(247, 332.4)   | 524<br>(461, 575)          | 475<br>(419.7, 519.3)   | 73.5<br>(28.6, 99.9)    |
| <b>Thailand</b>                       | 94593<br>(86714, 105123)   | 228.3<br>(209.7, 252.8) | 191793<br>(172618, 213989) | 195.5<br>(176.1, 218.2) | -14.4<br>(-26.5, -2.8)  |
| <b>East Timor</b>                     | 525<br>(382, 819)          | 151.4<br>(112.7, 230)   | 1481<br>(1136, 1936)       | 178.6<br>(139.1, 232)   | 17.9<br>(-19.1, 63.7)   |
| <b>Vietnam</b>                        | 117821<br>(101574, 136533) | 271.1<br>(234, 312.7)   | 285667<br>(242821, 333064) | 299<br>(256, 346.5)     | 10.3<br>(-13.8, 38)     |
| <b>Oceania</b>                        | 7597<br>(6101, 11183)      | 212<br>(175.7, 306.6)   | 16944<br>(13657, 24444)    | 216.3<br>(180.8, 301.9) | 2.1<br>(-12.8, 19.1)    |
| <b>American Samoa</b>                 | 71<br>(64, 79)             | 273.1<br>(243.1, 303)   | 121<br>(108, 136)          | 266.9<br>(238.9, 299.2) | -2.3<br>(-16.5, 16.5)   |
| <b>Federated States of Micronesia</b> | 132<br>(105, 178)          | 245.5<br>(196.9, 326.9) | 189<br>(138, 246)          | 248.2<br>(190.5, 314.8) | 1.1<br>(-20.2, 24.9)    |
| <b>Fiji</b>                           | 731<br>(617, 869)          | 172.5<br>(146.3, 203.7) | 1530<br>(1259, 1770)       | 197.9<br>(163.9, 227.6) | 14.7<br>(-11.1, 43.4)   |
| <b>Guam</b>                           | 244<br>(216, 278)          | 273<br>(244, 306.3)     | 556<br>(500, 622)          | 304.9<br>(275.7, 339.8) | 11.7<br>(-6, 33.6)      |
| <b>Kiribati</b>                       | 89<br>(78, 99)             | 208.7<br>(183.8, 230.9) | 165<br>(132, 200)          | 216<br>(173.4, 257.7)   | 3.5<br>(-19, 27)        |
| <b>Marshall Islands</b>               | 56<br>(41, 79)             | 286.7<br>(211, 409.7)   | 118<br>(90, 158)           | 316.2<br>(248.9, 413.8) | 10.3<br>(-8.8, 34.8)    |
| <b>Northern Mariana Islands</b>       | 55<br>(46, 66)             | 235.6<br>(200.7, 283.6) | 105<br>(92, 119)           | 195.6<br>(174.3, 220.1) | -17<br>(-32.9, 0.5)     |
| <b>Papua New Guinea</b>               | 4969<br>(3671, 8022)       | 214.8<br>(164, 340.2)   | 11691<br>(8655, 18683)     | 212<br>(164, 330.2)     | -1.3<br>(-19.3, 21.7)   |
| <b>Samoa</b>                          | 185<br>(150, 233)          | 202<br>(164.7, 253.6)   | 269<br>(217, 322)          | 190.4<br>(155.3, 228.4) | -5.8<br>(-27.3, 20.2)   |
| <b>Solomon Islands</b>                | 286<br>(219, 438)          | 172.1<br>(133.8, 261.6) | 663<br>(522, 892)          | 180.4<br>(147, 237.8)   | 4.8<br>(-15.6, 29.2)    |
| <b>Tonga</b>                          | 80<br>(70, 94)             | 139.8<br>(123.2, 162.9) | 121<br>(102, 141)          | 149.1<br>(125.6, 172.9) | 6.6<br>(-17.2, 32.2)    |
| <b>Vanuatu</b>                        | 197<br>(144, 281)          | 248<br>(187.8, 348.6)   | 483<br>(347, 671)          | 262.2<br>(192.6, 359.5) | 5.7<br>(-21.9, 39.3)    |
| <b>North Africa and Middle East</b>   | 336467<br>(283595, 442289) | 174.5<br>(148.2, 226.7) | 792334<br>(752239, 837918) | 174.5<br>(166.2, 183.7) | 0<br>(-22.8, 18.6)      |
| <b>Afghanistan</b>                    | 18694<br>(6997, 43686)     | 252.4<br>(96.2, 586.2)  | 38211<br>(20013, 75669)    | 290.1<br>(163.4, 539.9) | 14.9<br>(-16, 112.7)    |

|                             |                             |                         |                               |                         |                         |
|-----------------------------|-----------------------------|-------------------------|-------------------------------|-------------------------|-------------------------|
| <b>Algeria</b>              | 17875<br>(15915, 19808)     | 130.8<br>(116.4, 144.7) | 44968<br>(39104, 49938)       | 130.3<br>(113.3, 144.9) | -0.4<br>(-17.9, 17.4)   |
| <b>Bahrain</b>              | 467<br>(414, 520)           | 206.5<br>(178.3, 239)   | 1673<br>(1462, 1902)          | 145.7<br>(129, 164.5)   | -29.4<br>(-41.9, -11.3) |
| <b>Egypt</b>                | 37087<br>(33971, 40679)     | 108.4<br>(100.4, 118.8) | 87183<br>(71754, 100712)      | 126.2<br>(103.3, 145.2) | 16.5<br>(-8.2, 37.9)    |
| <b>Iran</b>                 | 46010<br>(39414, 56750)     | 153.7<br>(132.2, 188.4) | 131737<br>(117790, 137842)    | 178.2<br>(159.1, 186.5) | 15.9<br>(-9.5, 37.7)    |
| <b>Iraq</b>                 | 13759<br>(10809, 17890)     | 159.8<br>(127.2, 205.1) | 26354<br>(23807, 28919)       | 99.6<br>(90.3, 109)     | -37.7<br>(-52.9, -19)   |
| <b>Jordan</b>               | 4106<br>(3306, 4956)        | 243<br>(197.2, 292.3)   | 14022<br>(11706, 16401)       | 213.3<br>(178.7, 247.4) | -12.2<br>(-35.3, 16)    |
| <b>Kuwait</b>               | 1083<br>(1007, 1168)        | 120.6<br>(112.9, 129.8) | 3558<br>(3056, 4270)          | 119.8<br>(102.6, 142.7) | -0.7<br>(-13.2, 19.3)   |
| <b>Lebanon</b>              | 7186<br>(6043, 8460)        | 300.6<br>(253.4, 351.2) | 17244<br>(14100, 20449)       | 276.6<br>(227.1, 328.3) | -8<br>(-29.1, 15.4)     |
| <b>Libya</b>                | 5607<br>(4476, 7079)        | 263.2<br>(212.6, 329.9) | 16136<br>(13649, 19062)       | 306.2<br>(260.5, 359.5) | 16.3<br>(-13.3, 54.1)   |
| <b>Morocco</b>              | 19352<br>(16566, 22989)     | 125.3<br>(107.2, 148.2) | 47547<br>(38148, 57383)       | 143.9<br>(116.1, 173.1) | 14.9<br>(-17.4, 51.1)   |
| <b>Palestine</b>            | 3094<br>(2398, 4051)        | 317.1<br>(246.7, 410.5) | 8073<br>(7192, 8862)          | 289.4<br>(257.8, 318.3) | -8.7<br>(-33.6, 23.7)   |
| <b>Oman</b>                 | 1053<br>(822, 1347)         | 129.7<br>(101.9, 164.7) | 3040<br>(2451, 3652)          | 128.9<br>(105.9, 152.6) | -0.6<br>(-31, 35.1)     |
| <b>Qatar</b>                | 380<br>(306, 479)           | 261.3<br>(217.5, 319.8) | 1984<br>(1654, 2392)          | 181<br>(152, 215.2)     | -30.7<br>(-47.9, -8.1)  |
| <b>Saudi Arabia</b>         | 8842<br>(6813, 11661)       | 121<br>(93.5, 159)      | 41405<br>(34495, 49906)       | 196.8<br>(167.5, 225.5) | 62.6<br>(13.4, 126.2)   |
| <b>Sudan</b>                | 14819<br>(9265, 25907)      | 142.1<br>(92, 243.3)    | 30909<br>(22281, 44107)       | 154.1<br>(113.6, 213.3) | 8.5<br>(-25.6, 61.3)    |
| <b>Syria</b>                | 8348<br>(6803, 10540)       | 136.4<br>(112.4, 170.1) | 19155<br>(15791, 23272)       | 139.2<br>(114.9, 168.5) | 2<br>(-26.2, 34.7)      |
| <b>Tunisia</b>              | 7658<br>(6767, 8842)        | 144.4<br>(127.4, 166.4) | 19203<br>(15007, 23789)       | 155.6<br>(121.8, 192.8) | 7.8<br>(-22.6, 42)      |
| <b>Turkey</b>               | 110723<br>(86593, 144357)   | 281.6<br>(221.1, 365.7) | 199670<br>(179919, 223887)    | 225.9<br>(203.6, 253.1) | -19.8<br>(-41, 1.8)     |
| <b>United Arab Emirates</b> | 1352<br>(956, 1873)         | 228.6<br>(160.7, 320.5) | 12903<br>(10252, 16115)       | 261.8<br>(212.5, 316.7) | 14.5<br>(-24.9, 68.7)   |
| <b>Yemen</b>                | 8754<br>(4431, 16069)       | 151.6<br>(82.4, 270.8)  | 26618<br>(18215, 40273)       | 184.1<br>(129.1, 270.6) | 21.4<br>(-19, 108.1)    |
| <b>South Asia</b>           | 897358<br>(786161, 1090998) | 134.4<br>(118.6, 162.2) | 2129682<br>(1902148, 2300720) | 150.6<br>(134.7, 162.5) | 12.1<br>(-14.5, 34)     |
| <b>Bangladesh</b>           | 132207<br>(105656, 171016)  | 230.3<br>(189.4, 292)   | 208296<br>(178567, 241444)    | 158.6<br>(135.5, 185.4) | -31.1<br>(-50.2, -9)    |
| <b>Bhutan</b>               | 415<br>(294, 621)           | 146.2<br>(105.5, 216.9) | 916<br>(690, 1184)            | 142.5<br>(108.3, 184)   | -2.5<br>(-36.5, 44)     |
| <b>India</b>                | 663174<br>(576191, 815109)  | 124.2<br>(108.4, 151.8) | 1651581<br>(1491628, 1780292) | 145.9<br>(131.5, 157.3) | 17.4<br>(-10.9, 41.1)   |

|                                    |                            |                         |                            |                         |                        |
|------------------------------------|----------------------------|-------------------------|----------------------------|-------------------------|------------------------|
| <b>Nepal</b>                       | 13812<br>(9319, 21595)     | 129.4<br>(89, 199.7)    | 29360<br>(23066, 37900)    | 132<br>(104.8, 170.1)   | 2<br>(-27, 41)         |
| <b>Pakistan</b>                    | 87751<br>(78200, 97102)    | 140.9<br>(126, 156.1)   | 239530<br>(177456, 298485) | 188.6<br>(141.6, 233.2) | 33.9<br>(-0.1, 67.5)   |
| <b>Southern sub-Saharan Africa</b> | 55250<br>(51814, 59245)    | 181.6<br>(169, 196.3)   | 115680<br>(106259, 123470) | 198.4<br>(181.9, 211.9) | 9.3<br>(-0.1, 16.9)    |
| <b>Botswana</b>                    | 1134<br>(916, 1381)        | 179<br>(147.8, 215.7)   | 2454<br>(2016, 3126)       | 172<br>(143.5, 216.1)   | -3.9<br>(-27.3, 22.3)  |
| <b>Lesotho</b>                     | 1595<br>(1294, 2200)       | 153.4<br>(125.3, 208.5) | 2782<br>(2158, 3543)       | 219.3<br>(171.2, 276.7) | 43<br>(8, 84.3)        |
| <b>Namibia</b>                     | 1306<br>(1058, 1700)       | 168.4<br>(137.4, 217.3) | 2317<br>(1955, 2757)       | 157.8<br>(133.3, 187)   | -6.3<br>(-33.5, 25.3)  |
| <b>South Africa</b>                | 41853<br>(38902, 45412)    | 180.6<br>(165.6, 199.1) | 87711<br>(78349, 94952)    | 191<br>(170.1, 207.2)   | 5.8<br>(-2.7, 14.1)    |
| <b>Swaziland</b>                   | 711<br>(588, 904)          | 217.4<br>(180.5, 275.6) | 1642<br>(1263, 2085)       | 264.3<br>(205.8, 333.3) | 21.6<br>(-9.1, 57.9)   |
| <b>Zimbabwe</b>                    | 8651<br>(7589, 9839)       | 190.4<br>(168, 216.6)   | 18774<br>(15991, 22021)    | 246.6<br>(210.9, 288.4) | 29.5<br>(6.9, 55.6)    |
| <b>Western sub-Saharan Africa</b>  | 157130<br>(127879, 205389) | 166.8<br>(135.6, 218.1) | 321228<br>(273859, 381991) | 167.8<br>(144, 197.6)   | 0.6<br>(-24.5, 29.6)   |
| <b>Benin</b>                       | 3001<br>(2382, 3602)       | 139.2<br>(111, 166.9)   | 7800<br>(6114, 9919)       | 156<br>(124.2, 197.8)   | 12<br>(-12.1, 44.2)    |
| <b>Burkina Faso</b>                | 11933<br>(9512, 13948)     | 256.7<br>(206.6, 299)   | 25863<br>(21341, 30969)    | 271.3<br>(226.2, 321.6) | 5.7<br>(-18, 38.5)     |
| <b>Cameroon</b>                    | 8724<br>(7344, 10149)      | 178.7<br>(150.4, 208.6) | 23133<br>(16858, 29624)    | 187<br>(137.5, 238.4)   | 4.7<br>(-19.2, 30.8)   |
| <b>Cape Verde</b>                  | 185<br>(167, 203)          | 83.2<br>(75.2, 91.1)    | 653<br>(588, 719)          | 145.2<br>(130.7, 159.9) | 74.5<br>(52.4, 103.2)  |
| <b>Chad</b>                        | 4161<br>(3211, 5768)       | 138.1<br>(106.2, 190.8) | 9753<br>(7289, 13154)      | 167.8<br>(127.3, 224.9) | 21.5<br>(-0.7, 50.1)   |
| <b>Côte d'Ivoire</b>               | 5514<br>(4782, 6311)       | 119<br>(104.2, 134.6)   | 13139<br>(10310, 16575)    | 117.4<br>(93.1, 148.2)  | -1.3<br>(-25, 28.4)    |
| <b>The Gambia</b>                  | 482<br>(395, 583)          | 122.7<br>(101.7, 146.3) | 1277<br>(918, 1712)        | 130.2<br>(93.1, 174.2)  | 6.1<br>(-30.6, 49.8)   |
| <b>Ghana</b>                       | 11523<br>(9410, 14686)     | 163.2<br>(134.3, 205.9) | 29682<br>(23860, 35715)    | 178.2<br>(143.6, 213.1) | 9.2<br>(-25.3, 47.6)   |
| <b>Guinea</b>                      | 4530<br>(3993, 5033)       | 128.3<br>(113.4, 142.4) | 9039<br>(7227, 11470)      | 159.4<br>(127.6, 202.6) | 24.2<br>(-2.9, 61.5)   |
| <b>Guinea-Bissau</b>               | 1132<br>(597, 1843)        | 252.3<br>(136.5, 407.4) | 1769<br>(1214, 2459)       | 226.4<br>(159.8, 307.1) | -10.3<br>(-34.1, 32.5) |
| <b>Liberia</b>                     | 1956<br>(1537, 2580)       | 163.9<br>(129.3, 215.7) | 3727<br>(2731, 5210)       | 177.6<br>(130.5, 248.1) | 8.4<br>(-15.8, 36.5)   |
| <b>Mali</b>                        | 7436<br>(6585, 8461)       | 167.5<br>(149, 190.2)   | 13958<br>(10037, 19215)    | 156<br>(113.3, 213.5)   | -6.9<br>(-35.2, 32.8)  |
| <b>Mauritania</b>                  | 2050<br>(1511, 2801)       | 189.2<br>(140.3, 258.7) | 3571<br>(2703, 4691)       | 172.7<br>(130.7, 226.5) | -8.7<br>(-30.9, 27.6)  |
| <b>Niger</b>                       | 4604<br>(3119, 6773)       | 144.4<br>(99.9, 210.5)  | 10505<br>(7589, 15427)     | 132.9<br>(96.7, 193.1)  | -7.9<br>(-24.6, 12.1)  |

|                                   |                            |                         |                            |                         |                        |
|-----------------------------------|----------------------------|-------------------------|----------------------------|-------------------------|------------------------|
| <b>Nigeria</b>                    | 77487<br>(51958, 117393)   | 166.1<br>(113.6, 248.8) | 142246<br>(102215, 196438) | 164<br>(120.1, 222.6)   | -1.2<br>(-34.9, 53.9)  |
| <b>São Tomé and Príncipe</b>      | 120<br>(106, 138)          | 172<br>(152.1, 198.1)   | 279<br>(211, 367)          | 256.4<br>(195.1, 337.2) | 49.1<br>(10.1, 96.9)   |
| <b>Senegal</b>                    | 6729<br>(5285, 8768)       | 192.6<br>(151.4, 250.4) | 12253<br>(9495, 15341)     | 162.2<br>(125.5, 202.2) | -15.8<br>(-43.6, 23.8) |
| <b>Sierra Leone</b>               | 3603<br>(2582, 5029)       | 173.4<br>(124, 241.5)   | 6806<br>(5116, 9152)       | 184.7<br>(140.2, 246.9) | 6.5<br>(-16.9, 36.7)   |
| <b>Togo</b>                       | 1956<br>(1557, 2368)       | 138.5<br>(111.1, 167.1) | 5775<br>(4388, 7484)       | 152.7<br>(118.5, 194.9) | 10.2<br>(-11.1, 36.3)  |
| <b>Eastern sub-Saharan Africa</b> | 195930<br>(153433, 255324) | 232.2<br>(185.2, 298.4) | 375287<br>(346163, 399939) | 217.1<br>(200.8, 231.1) | -6.5<br>(-27.4, 20.1)  |
| <b>Burundi</b>                    | 4919<br>(3729, 6705)       | 199.8<br>(153.1, 267.2) | 8269<br>(6465, 10975)      | 178.4<br>(141.1, 231.3) | -10.7<br>(-29.8, 14.3) |
| <b>Comoros</b>                    | 611<br>(478, 809)          | 267.7<br>(210.9, 353.8) | 1181<br>(956, 1441)        | 246<br>(199.3, 299.8)   | -8.1<br>(-29.7, 21.4)  |
| <b>Djibouti</b>                   | 544<br>(341, 819)          | 295.6<br>(193.4, 441.7) | 1843<br>(1245, 2637)       | 291.2<br>(201.1, 410.1) | -1.5<br>(-32.9, 51.6)  |
| <b>Eritrea</b>                    | 3601<br>(2431, 5245)       | 314.2<br>(224.5, 451.8) | 8544<br>(6446, 10948)      | 316.2<br>(246.5, 400.6) | 0.6<br>(-28.1, 49.5)   |
| <b>Ethiopia</b>                   | 67861<br>(36758, 103452)   | 309<br>(174, 461.2)     | 100689<br>(88689, 111252)  | 234.1<br>(206.3, 258.7) | -24.3<br>(-50.2, 39.9) |
| <b>Kenya</b>                      | 15799<br>(13111, 19253)    | 169.9<br>(140.5, 208.2) | 43133<br>(38172, 49581)    | 185<br>(163.7, 213)     | 8.8<br>(-4.7, 23)      |
| <b>Madagascar</b>                 | 13680<br>(10433, 19043)    | 231.3<br>(177.1, 318.3) | 26062<br>(19447, 35515)    | 215.2<br>(162.4, 291.6) | -6.9<br>(-24.6, 16.2)  |
| <b>Malawi</b>                     | 4579<br>(2784, 5701)       | 104.2<br>(67.8, 127.4)  | 9570<br>(7653, 11485)      | 121.6<br>(97.9, 145.6)  | 16.7<br>(-12.4, 85)    |
| <b>Mozambique</b>                 | 17897<br>(15327, 20744)    | 263.3<br>(225.3, 304.3) | 36928<br>(30176, 45204)    | 298.7<br>(246.5, 361)   | 13.4<br>(-14.6, 47.5)  |
| <b>Rwanda</b>                     | 6139<br>(4596, 8306)       | 188.3<br>(140.7, 252.6) | 10224<br>(6459, 13847)     | 163.5<br>(104.5, 220.1) | -13.2<br>(-35.7, 16.4) |
| <b>Somalia</b>                    | 7605<br>(3671, 12922)      | 254.2<br>(135.9, 428.1) | 20065<br>(12684, 31777)    | 283.5<br>(183.5, 437.9) | 11.5<br>(-22.3, 85)    |
| <b>South Sudan</b>                | 6020<br>(3389, 9530)       | 228.6<br>(137.1, 360.1) | 10092<br>(6981, 14996)     | 238.4<br>(167.7, 349.4) | 4.3<br>(-26.3, 60.4)   |
| <b>Tanzania</b>                   | 25090<br>(18266, 31858)    | 211.8<br>(162.6, 265.4) | 50756<br>(42833, 59993)    | 197.5<br>(166.3, 233.8) | -6.8<br>(-31.3, 25.8)  |
| <b>Uganda</b>                     | 12513<br>(10615, 14665)    | 171.5<br>(145.2, 200.3) | 30274<br>(24885, 36046)    | 198.9<br>(164.8, 235.2) | 16<br>(-8.7, 47)       |
| <b>Zambia</b>                     | 8972<br>(6941, 11247)      | 277.8<br>(222.3, 341.4) | 17421<br>(14763, 20322)    | 246.5<br>(208.9, 284.4) | -11.3<br>(-34.6, 18.9) |
| <b>Central sub-Saharan Africa</b> | 48102<br>(37027, 65441)    | 189.9<br>(151.2, 249.7) | 105862<br>(87267, 133328)  | 189.5<br>(159.9, 231.8) | -0.2<br>(-16.7, 21.3)  |
| <b>Angola</b>                     | 9808<br>(6306, 15105)      | 216.6<br>(145.3, 321.5) | 25203<br>(20599, 31234)    | 210.6<br>(172, 256.2)   | -2.8<br>(-33.5, 44.7)  |
| <b>Central African Republic</b>   | 2983<br>(1665, 4929)       | 225.8<br>(133.6, 361.4) | 5500<br>(2984, 9448)       | 226.1<br>(132.6, 374.4) | 0.2<br>(-21.5, 27.6)   |



|                          |                         |                         |                         |                         |                       |
|--------------------------|-------------------------|-------------------------|-------------------------|-------------------------|-----------------------|
| <b>Congo</b>             | 3253<br>(2320, 4413)    | 272<br>(201.6, 359)     | 7060<br>(5381, 9293)    | 259.6<br>(204.4, 328.8) | -4.6<br>(-26.9, 29.9) |
| <b>DR Congo</b>          | 30036<br>(23309, 39900) | 171.9<br>(137.1, 221.6) | 64115<br>(49380, 85616) | 172.8<br>(136, 223.7)   | 0.5<br>(-19.8, 25.6)  |
| <b>Equatorial Guinea</b> | 494<br>(282, 809)       | 227.9<br>(138.1, 363.3) | 1107<br>(708, 1610)     | 215.8<br>(140.6, 307)   | -5.3<br>(-50.7, 71.1) |
| <b>Gabon</b>             | 1528<br>(1138, 2054)    | 255.4<br>(193.4, 338.4) | 2877<br>(2167, 3691)    | 258.8<br>(195.7, 325.7) | 1.3<br>(-27.9, 34.3)  |

## References

1. Roth GA, Abate D, Abate KH, et al. Global, regional, and national age-sex-specific mortality for 282 causes of death in 195 countries and territories, 1980–2017: a systematic analysis for the Global Burden of Disease Study 2017. *Lancet* 2018; **392**: 1736-88.
2. Global, regional, and national comparative risk assessment of 84 behavioural, environmental and occupational, and metabolic risks or clusters of risks for 195 countries and territories, 1990-2017: a systematic analysis for the Global Burden of Disease Study 2017. *Lancet* 2018; **392**: 1923-94.
